# Supplementary material for: Nocturnal increase of concentration of circulating tumor DNA in metastatic colorectal cancer patients with disease control but not with progressive disease
Source: Research Square preprint supplement (doi:10.21203/rs.3.rs-7761150/v1), 2025-12-10
Supplement: Supplementary file 1 [file 08cb9e8dc73559d2e31bf708.xlsx]

## Sheet: Exo_ctDNA
Patient	LabCode	Mutation	data	Lab_ID	ddPCR (mut/wt)	V aliquota cfDNA for ddPCR	Concentration mut/1mkL	Concentration wt/1mkL	V plasma mL	V dilution mkL	V reaction ddPCR mkL (V mix + V template)	Mut copies/ 1mL plasma* (Give higher priority to the concentrated probes)	Wt copies/ 1mL plasma	AF, %	Exo+Ct DNA V plasma mL	V dilution mkL	V aliquota cfDNA for ddPCR	V reaction ddPCR mkL (V mix + V template)	Concentration mut/1mkL exoDNA	Concentration wt/1mkL exoDNA	Mut copies/ 1mL plasma exoDNA	Concentration mut/1mkLCfDNA	Concentration wt/1mkL CfDNA	Mut copies/ 1mL plasma CfDNA	Diagnosis	Block
Болдырев Г.А.	БоГА	KRAS G13D	2024-11-05	БоГА p1	280/430	3	35.2	54	1.5	100	21	16426.7	25200	0.394619	1.5	100	3	21	27	39	12600	17.3	25.8	8073.33	РТК
Хохлов А.С.	ХоАС	KRAS G13D	2024-11-20	ХоАС p1 (P41214-1,2,3)	9/60	3	1.6	5.2	1.5	100	21	746.667	2426.67	0.235294	1.5	100	3	21	0.8	5.4	373.333	0.24	0.64	112	РТК
Ремизова Ант.Мих	РеАМ	KRAS Q61K	2024-11-29	РеАМ p1	710/449	3	38.1	24	2	100	21	13335	8400	0.613527	1.5	100	3	21	6.5	3.6	3033.33	53.7	20	25060	РТК
Цветков Г.И.	ЦвГИ	KRAS G13D	2024-12-10	ЦвГИ p1	0/350	3	0	18.2	2	100	21	0	6370	0	1.5	100	3	21	0.1	63	46.6667	0	0.79	0	РТК
Конькова Н.В.	КоНВ	KRAS G13D	2024-12-12	КоНВ p1	237/258	3	13.5	14.7	2	100	21	4725	5145	0.478723	1.5	100	3	21	8.5	14.2	3966.67	0.69	0.88	322	РТК	Прогресия	Капецитобин
Апельганц Е.А.	АпЕА	KRAS G12R	2024-12-13	АпЕА p1	261/914	8	12.9	46	2	100	20	1612.5	5750	0.219015	1.5	100	8	20	6.6	33.8	1100	0.8	3.2	133.333	РТК	Прогрессия	FOLFIRI
Кузнецов Ген.Вас	КуГВ	KRAS G12C	2024-12-18	КуГВ p1	0/295	8	0	27.3	2	100	20	0	3412.5	0	1.5	100	8	20	0.08	392	13.3333	0	0.08	0	РТК	Прогрессирование от 19.11.24	Регурафениб
Демченко Св. Вик	ДеСВ	KRAS G12V	2024-12-18	ДеСВ p1	0/375	3	0	18.3	2	100	21	0	6405	0	1.5	100	3	21	0	22.4	0	0.05	0.77	23.3333	РТК	Прогрессирование от 11.24	ПХТ XELOX
Турчиняк В.Н	ТуВН	KRAS G13D	2024-12-19	P41741	1/276	8	0.06	15.5	1.5	100	20	10	2583.33	0.00385604	1.5	100	3	21	0.15	132	70	0.05	0.15	23.3333	РТК	Стабилизация	ПХТ FOLFOX
Буряченко А.К.	БуАК	NRAS Q61K	2025-01-27	БуАК p1	3/591	8	0.12	24.9	2	100	20	15	3112.5	0.00479616	1.5	100	8	20	0.24	37.4	40	0.31	9.5	51.6667	РТК	Прогрессирование, Mts hep	FOLFOX-6
Мусаев Э.О.	МуЭО	KRAS G13D	2025-01-27	МуЭО p1	486/1023	8	41.1	88	2	100	20	5137.5	11000	0.318358	1.5	100	8	20	13.6	45	2266.67	12.9	22.5	2150	РТК	Прогрессирование, Mts hep	Наивная
Овсова Н.П.	ОвНП	BRAFV600E	2025-01-30	ОвНП p1	4/113	8	0.19	5.3	1.6	100	20	29.6875	828.125	0.0346084	1	100	8	20	0.05	9	12.5	0	0.04	0	РТК	Прогрессирование от 25.01.2025
Теремицкий В.Н.	ТеВН	KRAS G12D	2025-01-30	ТеВН p1	2462/8624	8	113.4	457	2	100	20	14175	57125	0.198808	1.5	100	8	20	66.2	289	11033.3	2	5.9	333.333	РТК	Прогрессирование от 01.2025 регорафениб
Морозова А.Н.	МоАН	KRAS G12D	2025-01-15	МоАН p1	0/373	3	0	14.6	1.4	100	21	0	7300	0	1.3	100	3	21	0	17.6	0	0	0.13	0	PTK	Прогрессирование от 01.2025 регорафениб
Зубова Ел.Мих	ЗуЕМ	KRAS G12V	2025-01-07	ЗуЕМ p1	2483/963	8	132	49.6	2	100	20	16500	6200	0.726872	1.5	100	8	20	107.9	41.5	17983.3	12.9	6.1	2150
Литвинова О.А.	ЛиОА	KRAS G12C	2025-02-27	P42722 p1																							fail мало капель, будет переставлен
Ремизова Ант.Мих2	РеАМ2	KRAS Q61K	2025-02-27	P42723 p1	0/10629							0									0			0

## Sheet: TRIPLE _PANc_rabrab
Patient	LabCode	Mutation	Serial number	Lab_ID	V plasma mL	ddPCR (mut/wt)	V aliquota cfDNA for ddPCR	Concentration mut/1mkL		Concentration wt/1mkL		V plasma mL	V dilution mkL	V reaction ddPCR mkL (20 + V template)	Mut copies/ 1mL plasma* (Give higher priority to the concentrated probes)	Mut copies/ 1mL plasma* (Give higher priority to the concentrated probes)	Wt copies/ 1mL plasma	AF, %	Exo+Ct DNA V plasma mL	V dilution mkL	V aliquota cfDNA for ddPCR	V reaction ddPCR mkL (20 + V template)	Concentration mut/1mkL exoDNA	Concentration wt/1mkL exoDNA	Mut copies/ 1mL plasma exoDNA	Mut copies/ 1mL plasma exoDNA	Concentration mut/1mkLCfDNA	Concentration wt/1mkL CfDNA	Mut copies/ 1mL plasma CfDNA	Mut copies/ 1mL plasma CfDNA	Diagnosis	Block	ID P#	Age	Plasma 1	Plasma 2	Plasma 3	Therapy	Disease Status	TNM	Notes	RNA blood
Пономарева Н.И.	ПоНИ	KRAS G12V	day1			25/1256	3	1.3	0,9-1,9	68.2	64,4-71,9	2	50	21	227.5	227.5			1.5	100	3	21	1.16	31.9	541.333	541.333	0	5.8	0	0	PanC	22-5858			2023-05-14 08:00:00	14.05.23 полночь	2023-05-15 08:00:00		прогрессирование от 12.05.23	.
			night			27/4106	3	1.4	0,9-2	231	224-238	2	50	21	245	245
			day2			34/1424	3	1.9	1,3-2,6	81.5	77,3-85,8	2	50	21	332.5	332.5
Маркова А.А.	МаАА	KRAS G12R	day1			0/202	3	0	0-0,13	9.1	7,8-10,3	2	50	21	0	0															PAnC	101596		72	2023-05-15 08:00:00	15.05.23 полночь	2023-05-16 08:00:00	на фоне FOLFIRINOX	частичный регресс	T4N0M0
			night			0/2161	3	0	0-0,13	98.2	94-102,3	2	50	21	0	0
			day2			0/750	3	0	0-0,16	39.8	36,9-42,6	2	50	21	0	0
Амаева А.Х.	АмАХ	KRAS G12V	day1			0/496	3	0	0-0,14	23.8	21,7-25,9	2	50	21	0	0															PanC	118194		56	2023-05-29 08:00:00	29.05.23 полночь	2023-05-30 08:00:00	на фоне 4 цикла FOLFIRINOX	? стабилизация	T4N2
			night			0/499	3	0	0-0,15	24.5	22,3-26,6	2	50	21	0	0
			day2			0/363	3	0	0-0,24	29.1	26,1-32,1	2	50	21	0	0
Клещев А.А.	КлАА	G12D	day1	Опухоль P33201??		0/1246	3	0	0-0,1	40.4	38,2-42,7	0.75	50		0	0															PanC			59	2023-07-06 08:00:00	06.07.23 полночь	2023-07-07 08:00:00			cT4N1M1
			night			0/558	3	0	0-0,1	18.9	17,4-20,5	2	50		0	0
			day2			0/3342	3	0	0-0,1	115.3	111,4-119,2	1.5	50		0	0
Потапова Л.А.	ПоЛА		day1	поставлен		0/78	3	0		5.2	4,2-6,5	2	50		0	0															PanC				2023-09-06 08:00:00	06.09.23 полночь	2023-09-07 08:00:00	Операция		T4N1M0
			night	на G12V		0/86	3	0		5.5	4,4-6,8	2	50		0	0
			day2			0/121	3	0		6.8	5,6-8	2	50		0	0
Панченко С.А.	ПаСА	G12V	day1			0/188	6	0	0-0,09	5.6	4,8-6,4	1.5	100	22	0	0															PanC				2023-09-06 08:00:00	06.09.23 полночь	2023-09-07 08:00:00			T2N0M0
			night			0/1158	6	0	0-0,09	35.3	33,2-37,3	1.5	100	22	0	0
			day2			0/387	6	0	0-0,1	13	11,7-14,3	1.5	100	22	0	0
Таирова А.А.	ТаАА	G12V	day1	есть блок+стекло		0/290	6	0	0-0,09	8.6	7,6-9,6	1.8	100		0	0															PanC									cT4N0M0
			night			0/182	6	0	0-0,42	25.6	21,9-29,3	1.8	100		0	0
			day2			0/338	6	0	0-0,08	9.5	8,5-10,5	1.75	100		0	0
Шувалова А.А.	ШуАА	G12V	day1	блок+стекло		0/422	6	0	0-0,1	14	12,7-15,4	1.8	50		0	0															PanC			63	2023-10-10 08:00:00	10.10.2023 полночь	2023-10-11 08:00:00					2023-10-11
			night			0/834	6	0	0-0,11	31.4	29,2-33,5	1.7	50		0	0
			day2			0/1245	6	0	0-0,09	39.5	37,3-41,7	2	50		0	0
Нестеренко Л.В.	НеЛВ	KRAS G13D	day1	Блок			3	0.21		4.61		1.9	100	21	77.3684	77.3684			1.5	100	3	21	0.09	4.3	42	42					РТК		ж	69	2024-03-29	Бабош	?
		29.03 - 30.03	night (4 ночи)	F3381			3	0.44		3.55		1.9	100	21	162.105	162.105																			2024-03-30
			day2				3	0.35		3.88		2	100	21	122.5	122.5			1.5	100	3	21	0.19	4.6	88.6667	88.6667									2024-03-30
Молостова Н.И.	МоНИ	NRAS Q61K	day1	Блок			3																								РТК		ж	72	2024-04-17	Бабош	Наивные, первичные, перед ПХТ
			night (4 ночи)	Fu3910			3																												2024-04-18
			day2	Плазмы F3910-1,2,3			3																												2024-04-18
Борисов В.М.	БоВМ1	KRAS G12D	day1				3	16.3		14.4		2	100	21	5705	5705			1.5	100	3	21	9.3	7.8	4340	4340	1.4	2.2	653.333	653.333	РТК		м	49	2024-04-28
WES	F2807n		night (4 ночи)				3	40		36.1		2	100	21	14000	14000			1.5	100	3	21	20.4	18.5	9520	9520	3.5	2.4	1633.33	1633.33					2024-04-29
			day2				3	23		20.5		2	100	21	8050	8050			1.5	100	3	21	25.6	25.5	11946.7	11946.7	0.91	1.6	424.667	424.667					2024-04-29
Борисов В.М.	БоВМ2	KRAS G12D	day1			459/419	3	20.4	18,5-22,3	18.6	16,8-20,4	2	100	21	7140	7140			1.5	100	3	21	5.2	4.9	2426.67	2426.67					РТК		м	49	2024-05-27	Бабош	Наивные, первичные, перед ПХТ
			night (4 ночи)			846/773	3	41.3	38,5-44,1	37.7	35-40,3	2	100	21	14455	14455			1.5	100	3	21	13.4	13.7	6253.33	6253.33	0.51	0.68	238	238					2024-05-28
			day2			497/466	3	23.4	21,4-25,5	22	20-24	2	100	21	8190	8190			1.5	100	3	21	12.4	12.1	5786.67	5786.67	0.86	0.81	401.333	401.333					2024-05-28
Турчиняк В.Н.	ТуВН	KRAS G13D	day1			0/70	3	0	0-0,12	2.8	2,2-3,5	1.4	100	21	0	0															РТК		м	65	2024-05-28	Бабош	Наивные, первичные, перед ПХТ
			night (4 ночи)			0/121	3	0	0-0,13	5.1	4,2-6	1.4	100	21	0	0																			2024-05-29
			day2			0/93	3	0	0-0,14	4.4	3,6-5,4	1.5	100	21	0	0																			2024-05-29
Нестеренко Л.В.	НеЛВ2	KRAS G13D	day1	Блок		1/52	3	0.08	0-0,4	4.4	3,3-5,7	1.7	100	21	32.9412	32.9412			1.5	100	3	21	0	14.7	0	0					РТК		ж	69	2024-05-04	Бабош	На фоне ПХТ 2 курс прогрессирование
		04.05 - 05.05	night (4 ночи)	F3381		2/60	3	0.15	0,02-0,47	4.4	3,4-5,6	1.9	100	21	55.2632	55.2632			1.5	100	3	21	0	6.1	0	0									2024-05-05
			day2			0/31	3	0		2.4	1,6-3,3	2	100	21	0	0			1.5	100	3	21	0	22.3	0	0									2024-05-05
Молостова Н.И.	МоНИ	NRAS Q61K	day1	Блок			3	0		11.3		2	100	21	0	0			1.5	100	4	22	0	0.3	0	0	0	0.31	0	0	РТК		ж	72	2024-05-16	Бабош	Наивные, первичные, перед ПХТ
			night (4 ночи)	Fu3910			3	0		16.3		2	100	21	0	0			1.5	100	4	22	0	0.24	0	0	0	0.16	0	0					2024-05-17
			day2	Плазмы F3910-1,2,3			3	0		25.2		2	100	21	0	0			1.5	100	4	22	0	0.4	0	0	0	0.14	0	0					2024-05-16
Болдырев Г.А.	БоГА	KRAS G13D	day1			73/5333	3	5.3	4,1-6,6	465	452-478	2	100	21	1855	1855			0.5	50	3	21	3.9	55	2730	2730					РТК		м	69	2024-06-27	Бабош
			night (4 ночи)			117/931	3	8.1	6,6-9,6	66	61,8-70,3	1.9	100	21	2984.21	2984.21			0.4	50	3	21	5.1	22.6	4462.5	4462.5									2024-06-28
			day2			259/734	3	17.2	15,1-19,3	49.4	45,8-53	2	100	21	6020	6020			0.4	50	3	21	8.5	20.3	7437.5	7437.5									2024-06-28
Полещук В.И.	ПоВИ	KRAS G12С din	day1 (10:00)			0/5030	3	0		517	503-531	2	100	21	0	0			0.5	50	3	21	0	126	0	0	0	0	0	0	РТК		м	72	2024-06-28	Бабош
	Опухоль F6055	.	night (04:00)			0/4647	3	0		581	564-598	1.9	100	21	0	0			0.5	50	3	21	0	122	0	0	0	0.16	0	0					2024-06-29
			day2 (10:00)			0/2808	3	0		591	569-613	2	100	21	0	0			0.5	50	3	21	0	130	0	0	0	0.15	0	0					2024-06-29
Тарабукина А.Ю.	ТаАЮ	KRAS G12D	day1 (10:00)	Блок			3	89.4		280		2	100	21	31290	31290	98000		1.5	100	4	22	0.44	2.1	161.333	161.333	0.3	0.89	110	110	РТК		ж	72	2024-08-15	Бабош
			night (04:00)	F41834			3	64.5		203		2	100	21	22575	22575	71050		1.5	100	4	22	0.4	1.2	146.667	146.667	0.39	1.09	143	143					2024-08-16
			day2 (10:00)	Плазмы P39636-1,2,3			3	60.2		415		2	100	21	21070	21070	145250		1.5	100	4	22	0.26	2	95.3333	95.3333	0.26	1.03	95.3333	95.3333					2024-08-16
Евдокименков В.В.	ЕвВВ	KRAS G12D	day1	Плазмы P39697-1,2,3	1.4		3	4.2		71.3		1.4	100	21	2100	2100	35650		0.5	50	3	21	2	38.5	1400	1400									2024-08-21	Бабош
			night (4 ночи)		1.5		3	4.4		166		1.5	100	21	2053.33	2053.33	77466.7		0.5	50	3	21	1.7	70	1190	1190									2024-08-22
			day2		1.3		3	3.5		12.1		1.3	100	21	1884.62	1884.62	6515.38		0.5	50	3	21	2.3	8.7	1610	1610									2024-08-22
Романцов А.В.	РоАВ	BRAF V600E	day1	РоАВ d1	1.5	2968/2516	3	185		155		1.5	100	21	86333.3	86333.3	72333.3		1.5	100	3	21	148	173	69066.7	69066.7	54.3	43.4	25340	25340	РТК		м	52		Бабош
WES	Опухоль G1159	.	night (4 ночи)	РоАВ night	1.5	2885/2362	3	141		114		1.5	100	21	65800	65800	53200		1.5	100	3	21	142	153	66266.7	66266.7	96.1	84.4	44846.7	44846.7
			day2	РоАВ d2	1.5	925/735	3	55.8		44.1		1.5	100	21	26040	26040	20580		1.5	100	3	21	96	88.1	44800	44800	26.8	21.5	12506.7	12506.7
Токтохоева О.А.	ТоОА	KRAS G12R	day1	P41076-1,2,3	1.5		3	0		162		1.5	100	21	0	0	75600		1.5	100	8	20	0	1370	0	0					РТК					Бабош					NGS: KRAS G12R 17%
			night (4 ночи)		1.5		3	0		2.3		1.5	100	21	0	0	1073.33			100	8	20	0	347	#VALUE!	0	0	0	#VALUE!	0
			day2		1.5		3	0		58.8		1.5	100	21	0	0	27440		1.5	100	8	20	0	17.1	0	0	0.14	0.41	23.3333	23.3333
Новоковский И.А.	НоИА	KRAS A146V	day1	P41309-1	1.9	774/507	3	59.2		38.4		1.9	100	21	21810.5	21810.5	14147.4		1.5	100	3	21	38.2	23.5	17826.7	17826.7	6.3	3.8	2940	2940	РТК				2024-11-26	Бабош
			night (4 ночи)	P41309-2	1.9	1357/431	3	90.7		28		1.9	100	21	33415.8	33415.8	10315.8		1.5	100	3	21	54.5	20.3	25433.3	25433.3	10.7	3.7	4993.33	4993.33					2024-11-27
			day2	P41309-3	1.9	1255/596	3	131		60.3		1.9	100	21	48263.2	48263.2	22215.8		1.5	100	3	21	66.4	32.8	30986.7	30986.7	34.7	18.3	16193.3	16193.3					2024-11-27
Николаев Се.Ни	НиСН	KRAS G12D	day1	Плазмы P -1,2,3	2	2/272	3	0.1		14		2	100	21	35	35	4900		1.5	100	3	21	0.14	13.1	65.3333	65.3333	0	0.16	0	0	РТК		м	71	2025-01-17	Лука	Наивная, прогрессирование		T2N1M1 (per, hep)
			night (4 ночи)		2	1/400	3	0.04		15.3		2	100	21	14	14	5355		1.5	100	3	21	0.08	22.4	37.3333	37.3333	0.04	0.45	18.6667	18.6667					2025-01-18
			day2		2	0/262	3	0		15.1		2	100	21	0	0	5285		1.5	100	3	21	0.06	18.4	28	28	0	0.45	0	0					2025-01-18
Мухин Иг.Ив	МуИИ	KRAS Q61R	day1	Плазмы P -1,2,3	2	84/463	8	7.2		40.1		2	100	20	900	900	5012.5		1.5	100	8	20	4.4	30.4	733.333	733.333	2.2	4.2	366.667	366.667	РТК		м	56	2025-01-20	Лука	Стабилизация на фоне FOLFOX + Бевацизумаб (от 20.11.2024)		T3N1M1b (per,Hep)
			night (4 ночи)		2	8/105	8	0.61		8.1		2	100	20	76.25	76.25	1012.5		1.5	100	8	20	0.5	73	83.3333	83.3333	0.4	0.71	66.6667	66.6667					2025-01-21
			day2		2	29/156	8	6.3		34		2	100	20	787.5	787.5	4250		1.5	100	8	20	2	164	333.333	333.333	0.6	5.2	100	100					2025-01-21
Диланян Ра.За	ДиРЗ	KRAS 12/13	day1	Плазмы P -1,2,3	2		3					2	100						1.5	100											РТК		м		2025-01-20	Лука	Стабилизация на фоне FOLFOX + Бевацизумаб (от 18.11.2024)		T4N0M0 (09.2024 - Mts hep)		NGS: WT
			night (4 ночи)		2		3					2	100						1.5	100															2025-01-21
			day2		2		3					2	100						1.5	100															2025-01-21
Галяев Юр.Ви	ГаЮВ	KRAS G12C	day1	Плазмы P -1,2,3	1	0/509	3	0		20.6		1	100	21	0	0	14420		0.9	100											РТК		м	65	2025-01-21	Бабош	Прогрессирование 12.2024. на фоне бевацизумаба (21.01.2025)
			night (4 ночи)		1.5	0/1422	3	0		57.9		1.5	100	21	0	0	27020		1.3	100															2025-01-22
			day2		1.4	0/4264	3	0.4		201		1.4	100	21	0	0	100500		1.2	100															2025-01-22
Кирьянова Л.В.	КиЛВ	KRAS G12D	day1	Плазмы P -1,2,3	2	5/178	3	0.22		8		2	100	21	77	77	2800		1.5	100	8	20	0	12.8	0	0	0	7	0	0	РТК		ж	73	2025-01-24	Лука	Стабилизация от 05.06.2024 FOLFOX+бевацизумаб
			night (4 ночи)		2	2/135	3	0.09		5.8		2	100	21	31.5	31.5	2030		1.5	100	8	20	0	20.7	0	0	0	17.6	0	0					2025-01-25
			day2		2	11/237	3	0.47		10.2		2	100	21	164.5	164.5	3570		1.5	100	8	20	0.06	19.7	10	10	0	16.7	0	0					2025-01-25
Цилёва В.А.	ЦиВА	KRAS A146T	day1	Плазмы P -1,2,3	2	0/214	8	0		14.5		2	100	20	0	0	1812.5		1.5	100	8	20	0	11.8	0	0	0.07	0.9	11.6667	11.6667	РТК		ж	68	2025-01-27	Лука	Стабилизация 03.12.2024 DeGramont + бевацизумаб
			night (4 ночи)		2	0/445	8	0		27.4		2	100	20	0	0	3425		1.5	100	8	20	0	15	0	0	0	2.5	0	0					2025-01-28
			day2		1.9	0/542	8	0		25.7		1.9	100	20	0	0	3381.58		1.5	100	8	20	0	25.7	0	0	0	2.2	0	0					2025-01-28
Романцов А.В.	РоАВ2	BRAF V600E	day1	Плазмы P -1,2,3	2	1/310	8	0.06		18.3		2	100	20	7.5	7.5	2287.5		1.5	100	8	20	0	14.2	0	0	0.05	2.1	8.33333	8.33333	РТК		м		2025-01-26	Бабош
2			night (4 ночи)		2	4/289	8	0.25		17.9		2	100	20	31.25	31.25	2237.5		1.5	100	8	20	0	17	0	0	0	1.5	0	0					2025-01-27
			day2		2	2/379	8	0.14		27.8		2	100	20	17.5	17.5	3475		1.5	100	8	20	0.08	7.3	13.3333	13.3333	0.08	1.9	13.3333	13.3333					2025-01-27
Кузнезова Анг.Ген	КуАГ	KRAS G12D	day1	Плазмы P -1,2,3	2	105/341	8	8		26.2		2	100	21	1050	1050	3438.75		1.5	100	8	20	4.9	18.7	816.667	816.667	0.56	1.6	93.3333	93.3333	РТК		ж		2025-01-27	Бабош	Прогрессирование август 2024 FOLFIRI
			night (4 ночи)		2	119/518	8	7.8		34.5		2	100	21	1023.75	1023.75	4528.12		1.5	100	8	20	0.7	2.2	116.667	116.667	0.8	1.3	133.333	133.333					2025-01-28
			day2		2	94/296	8	8.2		26		2	100	21	1076.25	1076.25	3412.5		1.5	100	8	20	3.8	15.2	633.333	633.333	0.37	1.2	61.6667	61.6667					2025-01-28
Борисов В.М.	БоВМ3	KRAS G12D	day1	Плазмы P -1,2,3	2	4803/3927	3	295		235		2	100	21	103250	103250	82250		1.5	100	3	21	183	154	85400	85400	22.7	14.3	10593.3	10593.3	РТК		м	49	2025-01-14	Бабош
			night (4 ночи)		2	4237/4120	3	205		199		2	100	21	71750	71750	69650		1.5	100	3	21	125	123.3	58333.3	58333.3	47.5	40.7	22166.7	22166.7					2025-01-15
			day2		2	5244/5075	3	274		264		2	100	21	95900	95900	92400		1.5	100	3	21	154	152	71866.7	71866.7	51.6	46.3	24080	24080					2025-01-15
Новоковский И.А.	НоИА2	KRAS A146V	day1	Плазмы P -1,2,3	2	2020/1421	3	125		86.5		2	100	21	43750	43750	30275		1.5	100	3	21	72	52.4	33600	33600	12.3	6.1	5740	5740	РТК				2025-01-15	Бабош
			night (4 ночи)		2	2628/1286	3	159		75.3		2	100	21	55650	55650	26355		1.5	100	3	21	98	53.3	45733.3	45733.3	4.5	1.8	2100	2100					2025-01-16
			day2		1.4	1704/1382	3	93.9		75.5		2	100	21	32865	32865	37750		1.5	100	3	21	54.3	47.4	25340	25340	0.36	0.88	168	168					2025-01-16
Ушкальцева Н.В.	УшНВ	KRAS A146?	day1	Плазмы P -1,2,3	2	3/632	8	0.19		40.8		2	100	20	23.75	23.75	5100		1.5	100	8	20	0.22	54.4	36.6667	36.6667	0.12	1.2	20	20	РТК		ж	68	2025-02-05	Лука					NGS: G13D?
		ddPCR-G13D	night (4 ночи)		2	0,06/19,3	8	0.06		19.3		2	100	20	7.5	7.5	2412.5		1.5	100	8	20	0	23.8	0	0	0.18	0.6	30	30					2025-02-06
			day2		2	0/23	8	0		23		2	100	20	0	0	2875		1.5	100	8	20	0	38.9	0	0	0	1.2	0	0					2025-02-06
Илларионова О.М.	ИлОМ	KRAS G12S	day1	Плазмы P -1,2,3	2	0/909	8	0		44.7		2	100	20	0	0	5587.5		1.5	100	8	20	0	33.2	0	0	0	5.3	0	0	РТК		ж	59	2025-02-07	Лука	Стабилизация от 25.11.2024 на фоне FOLFIRI + рамуцирумаб
			night (4 ночи)		2	0/528	8	0		26.9		2	100	20	0	0	3362.5		1	100	8	20	0	14	0	0	0	0.17	0	0					2025-02-08
			day2		2	0/6583	8	0		262		2	100	20	0	0	32750		1.5	100	8	20	0	1548	0	0	0.35	0.74	58.3333	58.3333					2025-02-08
Толкач Ал.Па.	ТоАП	KRAS A146T	day1	Плазмы P -1,2,3	1.45	0/8544	8	0		2560		1.45	100	20	0	0	441379		1	100	8	20	0	2420	0	0	0	7.6	0	0	РТК		ж	48	2025-02-07	Лука	Прогрессирование от 13.11.2024 на фоне FOLFIRI + бевацизумаб
			night (4 ночи)		2	2/703	8	0.22		79		2	100	20	27.5	27.5	9875		1.5	100	8	20	0	276	0	0	0	0.26	0	0					2025-02-08
			day2		2	1/53	8	0		5.8		2	100	20	0	0	725		1.5	100	8	20	0	8.7	0	0	0.13	0.4	21.6667	21.6667					2025-02-08
Кузнезова Анг.Ген	КуАГ2	KRAS G12D	day1	P42786	2	40/446	8	3.7		41.5		2	100	20	462.5	462.5	5187.5		1.5	100	8	20	2.1	280	350	350	0	1.7	0	0	РТК		ж		2025-01-27	Бабош	На фоне 3 курс FOLFIRI
2			night (4 ночи)	P42787	2	114/843	8	7		52.2		2	100	20	875	875	6525		1.5	100	8	20	5.4	80.2	900	900	0.8	2.2	133.333	133.333					2025-01-28
			day2	P42788	2	63/243	8	3.3		13.7		2	100	20	412.5	412.5	1712.5		1.5	100	8	20	2.5	12.6	416.667	416.667	0.24	1.4	40	40					2025-01-28
			day1	Плазмы P -1,2,3			8						100	20						100	8	20
			night (4 ночи)				8						100	20						100	8	20
			day2				8						100	20						100	8	20
			day1	Плазмы P -1,2,3			8						100	20						100	8	20
			night (4 ночи)				8						100	20						100	8	20
			day2				8						100	20						100	8	20
			day1	Плазмы P -1,2,3			8						100	20						100	8	20
			night (4 ночи)				8						100	20						100	8	20
			day2				8						100	20						100	8	20

## Sheet: Вовспоизводимость_rabtab
Patient	LAB_CODE	Mutation	Serial number	Lab ID	ddPCR (mut/wt)	V aliquota cfDNA for ddPCR	Concentration mut/1mkL	Interval (Poisson CI)	Concentration wt/1mkL	Interval (Poisson CI)	V plasma mL	V dilution mkL	V reaction ddPCR mkL (18 + V template)	Mut copies/ 1mL plasma* (Give higher priority to the concentrated probes)	Mut copies/ 1mL plasma* (Give higher priority to the concentrated probes)	AF, %	Exo+Ct DNA Vplasma mL	V dilution mkL	V aliquota cfDNA for ddPCR	V reaction ddPCR mkL (18 + V template)	Concentration mut/1mkL exoDNA	Concentration wt/1mkL exoDNA	Mut copies/ 1mL plasma exoDNA	Concentration mut/1mkLCfDNA	Concentration wt/1mkL CfDNA	Mut copies/ 1mL plasma CfDNA	Age	Localization	Diagnosis	Plasma 1	ctDNA extract	Exo extract	Plasma 2	ctDNA extract	Exo extract	Plasma 3	blood (RNA)	Total RNA extract	Therapy	Disease Status	TNM	Block	Source
Карпеев Дм. Валер	КаДВ	KRAS G12D	day1		24/21	3	1.06	0,69-1,54	0.93	0,58-1,38	2	50	21	185.5	185.5												55	CRC	Ad поперечно-ободочной	2023-05-15			2023-05-16						2 цикла ХТ FOLFOX / 3 цикла Иринотекан+бевацизумаб (24.04.23)	прогрессирование от 03.2023	pT4bN2bM1 (hep)		KROL
			day2		62/47	3	2.5	2-3,2	1.9	1,4-2,5	2	50	21	437.5	437.5
Саулевич Ан.Ал	СаАА	KRAS G12D	day1		0/475	3	0	0-0,12	18.8	17,1-20,5	2	50	21	0	0												35	CRC	Сигмовидная	2023-05-15			2023-05-16						на фоне ХТ FOLFOX + бевацизумаб	регресс	T3N1M1a		KROL
			day2		0/452	3	0	0-0,12	18.8	17,1-20,6	2	50	21	0	0
Крюкова В.В.	КрВВ	KRAS G12A	day1		0/480	3	0	0-0,1	16.9	15,4-18,4	2	50	21	0	0												73	CRC	Ободочная	2023-05-15			2023-05-15						на фоне ХТ FOLFOX + бевацизумаб	стабилизация от 30.03.23	T3N2aM1b(hep, pulm)		KROL
			day2		0/6	3	0	0-0,12	0.25	0,1-0,51	2	50	21	0	0
Высоцкий Л.М.	ВыЛМ	BRAF V600E	day1	+	0/1651	8	0	0-0,11	60.7	57,8-63,7	2	50	20	0	0												79	CRC	ободочная	2023-05-18			2023-05-19						на фоне ПХТ XELOX jот 03.2023	прогресс?	T4N2bM1 (hep, pulm)		KROL
			day2	+	0/4566	8	0	0-0,1	166.2	161,4-171	2	50	20	0	0
Зубков В.А.	ЗуВА	KRAS A146T	day1		0/4	3	0	0-0,11	0.15	0,04-0,35	2	50	21	0	0		1.5	100	3	21	1.8	15.9	840				50	CRC	Слепая кишка	2023-05-29			2023-05-30						на фоне 2 линии FOLFIRI +бевацизумаб	стабилизация от 21.02.2023	T4aN2bM1c (hep, peri,		KROL
			day2		0/8	3	0	0-0,11	0.28	0,13-0,58	2	50	21	0	0		1.5	100	3	21	2.3	14.4	1073.33
Харченко И.Н.	ХаИН	KRAS G12A	day1		0/41	3	0	0-0,12	1.7	1,2-2,3	2	50	21	0	0		1.5	100	3	21	0.3	580	140				55	CRC	Толстая кишка	2023-05-29			2023-05-30						на фоне XT иринотекан+бевацизумаб	прргрессирование mts в печени от 03.2023	T4aN1aMx		KROL
			day2		0/47	3	0	0-0,11	1.72	1,27-2,25	1.5	50	21	0	0		1.5	100	3	21	0.25	507	116.667
Зырянова Т.А.	ЗыТА	KRAS G13D	day1		0/310	3	0	0-0,1	10.1	9-11,2	2	50	21	0	0												59	CRC	Ad поперечно-ободочной	2023-06-09			2023-06-10						На фоне Капкцитабин + бевацизумаб	стабилизация от 04.2023	T4N1 M0		KROL
			day2		0/182	3	0	0-0,1	6	5,1-6,8	2	50	21	0	0
Куреляк Ж.В.	КуЖВ	KRAS G12D	day1		0/489	3	0	0-0,13	20.7	18,9-22,6	1	50	21	0	0												56	CRC	Сигмовидная	2023-07-19			2023-07-20						На фоне бевацизкмаба (с 12.2022)	прогрессирование от 29.05.2023	T4bN2bM1b (per, oth)		KROL
			day2		0/176	3	0	0-0,12	7	5,9-8	2	50	21	0	0
Веселов МА	ВеМА	BRAF V600E	day1		182/396	3	29.9	25,6-34,3	66	60-73	1.5	50	21	6976.67	6976.67												63	РЛ		2023-03-14	+		2023-03-15	+			2023-03-14		на фоне ТС+ бевацизумаб (с 21.02.23)	прогрессирование от 02.2023	T4N3M1 (oss, hep, pul)	yes 169461 (от 27.09.2022
			day2		543/1295	3	45.1	41,3-48,9	111	105-117	1.5	50	21	10523.3	10523.3
Вагин СЕ	ВаСЕ	KRAS G12C	day1		72/97	3	7.3	5,7-9,1	9.8	8-11,9	1.5	50	21	1703.33	1703.33		0.9	100	3	21	5.1	11.4	3966.67	0.45	0.68	350	67	РЛ		2023-03-15	+		2023-03-16	+			2023-03-15		на фоне ПХТ (карбоплатин/пеметрексед + бевацизумаб (с 21.02.23)	прогрессирование от 11.2022	T3N2M1 (IV st. oss, pulm)	yes 159843-2
			day2		11/128	3	1.1	0,5-1,8	12.4	10,2-14,5	1.5	50	21	256.667	256.667
Терентьев С.В.	ТеСВ	BRAF V600E	day1	(тотальный гемолиз)+	0/5178	3	0	0-0,46	1315	1278-1353	2	50	21	0	0		1.5	100	3	21	0	1654	0	fail	fail	fail	55	CRC		2023-03-22			2023-03-23				22.03.2023 (откручены)		на фоне ПХТ (FOLFOX-бевацизумаб)	регресс опухоли, mts в печени и рег лимфоузлах	T4N1M1(hep)	yes 162119 (07.11.2022)
			day2		0/103	3	0	0-0,3	10.5	8,4-12,5	2	50	21	0	0		1.5	100	3	21	0	5.5	0	fail	fail	fail
Белякова Т.А.	БеТА	BRAF V600E	day1		0/22	6	0	0-0,13	0.92	0,59-1,37	2	50	20	0	0												71	CRC		2023-03-24			2023-03-27				2023-03-24		на фоне 1 линии ПХТ FOLFOX + бевацизумаб (начата за 10 дней до сдачи плазмы)	nd	T3NxM1 (per)	yes 158411 (от10.12.2022)
			day2		0/139	3	0	0-0,22	10.5	8,7-12,2	1.5	50	21	0	0
			day3	+	0/363	8	0	0-0,19	23	20,6-25,3	2	50	20	0	0		1.2	100	3	21	0	8.3
			2023-09-28		0/15	6	0	0-0,13	0.64	0,37-1,05	2	50	20	0	0															2023-09-28
Мохнатых А.В.	МоАВ	BRAF V600E	day1		5/415	3	0.25	0,09-0,55	21.1	19,1-23,2	1.5	50	21	58.3333	58.3333		1.5	100	3	21	0	8.5	0	0	0.32	0	56	CRC		2023-03-27			2023-03-28				2023-03-27		на фоне 1 линии ПХТ FOLFOX + бевацизумаб (начата за 37 дней до сдачи плазмы)	прогрессирование, асцит	T4aN1M1(hep, per)	yes 168144
			day2		0/231	3	0	0-0,23	17.6	15,3-19,9	2	50	21	0	0
			2023-10-13		0/6	6	0	0-0,3	0.6	0,2-1,2	1.76	50	20	0	0
			2023-10-17		3/58	8	0.22	0,05-0,59	4.3	3,3-5,5	1.85	50	20	14.8649	14.8649
			2023-10-31		0/11	6	0	0-0,14	0.51	0,26-0,88	1.85	50	20	0	0
			2023-11-29		2/121	3	0.12	0,02-0,37	7	5,8-8,3	1.5	50	21	28	28		1.2	100	3	21	0	6.5	0	0	0.25	0
			2024-01-19		0/103	3	0	0-0,14	4.7	3,8-5,6		50	21	0	0		1.5	100	3	21	0	3.5	0	0	0.38	0
			2024-02-05		0/110	3	0	0-0,13	4.7	3,8-5,6		50	21	0	0		0.9	100	3	21	0	10.3	0	0	0.1	0
			2024-02-20		nd	nd	nd	nd	nd	nd	nd	50	nd	nd	nd		1.5	100	3	21	0	72	0	0	0.3	0
Романович И.Н.	РоИН	BRAFV600E	day1		0/64	3	0	0-0,18	3.9	3,1-5	2	50	21	0	0												66	CRC		2023-03-28			2023-03-29				2023-03-28		Операция 06.02 + XELOX 07.03.2023	nd	T3N1bM0	yes 168859
			day2		2/74	3	0.24	0,04-0,78	9	7,1-11,2	2	50	21	42	42
Молодожникова Л.В.	МоЛА	BRAFV600E, MSI-H	day1		0/89	3	0	0-0,46	13.8	11,1-16,9	2	50	21	0	0												74	CRC		2023-03-28			2023-03-29				2023-03-28		XELOX N3 (09.2021)	прогрессирование	T4bN1Mx
			day2		0/43	3	0	0-0,38	5.5	4-7,3	2	50	21	0	0
Иксанова И.В.	ИкИВ	KRAS G12A	day1		19/238	3	1.4	0,9-2,1	17.5	15,3-19,8	2	50	21	245	245												63	CRC		2023-03-30			2023-03-31	+			2023-03-30		на фоне 1 линии ПХТ FOLFIRI + бевацизумаб	частичный регресс от 08.22, сейчас возможно прогрессирование??	T3N1M1 (hep, pulm)
			day2		14/207	3	1.1	0,6-1,7	15.7	13,6-17,8	1.5	50	21	256.667	256.667
Карсканова Т.Н.	КаТН	NRAS G13R	day1		0/163	3	0	0-0,16	8.9	7,5-10,3	1.5	50	21	0	0												57	CRC		2023-03-30	+		2023-03-31	+			2023-03-30		на фоне 1 линии ПХТ FOLFIRI + бевацизумаб	прогрессирование от 11.2022	T4aN2a
			day2		0/157	3	0	0-0,17	9.1	7,7-10,5	2	50	21	0	0
Славец Е.А.	СлЕА	KRAS G12C	day1		8/47	3	0.69	0,31-1,29	4.1	3-5,3	0.5	50	21	483	483												50	CRC		2023-03-30	+		2023-03-31	+			2023-03-30		Наивная опухоль	прогрессирование	T4N1M1 (hep, lym)	yes 168873
			day2		74/235	3	6.3	5-7,8	20.1	17,5-22,6	1	50	21	2205	2205
			day3 02.09.23		62/574	3	2.3	1,8-3	21.7	19,9-23,5	1.5	50	21	536.667	536.667		1.5	100	4	22	0.19	0.23	69.6667	0	0.18	0
			day4 08.09.23		35/279	3	1.47	1,03-2,02	11.8	10,4-13,2	1.5	50	21	343	343		1.5	100	4	22	0.08	0.25	29.3333	0	0.19	0
Беляков Ю.А.	БеЮА	KRAS G12V	day1		90/293	3	7.3	5,9-8,9	23.9	21,2-26,6	2	50	21	1277.5	1277.5		1.5	100	3	21	2.3	13.1	1073.33	0	0	0	58	CRC		2023-04-03			2023-04-04				2023-04-04		на фоне FOLFOX + бевацизумаб (с 12.2022)	увеличение очагов в печени в рамках SD	T3N1M1 (hep)	yes 162551
			day2		72/310	3	5.5	4,3-6,8	23.7	21,1-26,4	2	50	21	962.5	962.5		1.5	100	3	21	2.2	10.5	1026.67	0	0	0
Бруенок А.Б.	БрАБ	KRAS G12D	day1		336/437	3	23.1	20,6-25,5	30.1	27,3-32,9	2	50	21	4042.5	4042.5		1.5	100	3	21	2.8	6.8	1306.67	0	0	0	50	CRC		2023-04-03			2023-04-04				2023-04-04		на фоне 1 цикла Иринотекан, фторурацил, Бевацизумаб	прогрессирование от 01.2023	T4bN2aM0	yes 147747
			day2		417/553	3	27.5	24,9-30,1	36.6	33,6-39,7	2	50	21	4812.5	4812.5		1.5	100	3	21	9.7	24.3	4526.67	0	0	0
Михайлов А.В.	МиАВ	KRAS G12D	day1		0/125	3	0	0-0,22	9.3	7,7-10,9	2	50	21	0	0												46	CRC		2023-04-10			2023-04-11				2023-04-10		на фоне FOLFOX + бевацизумаб (с 25.01.2023)	стаблизация от 03.03.2023	T3cN2bM1 (hep, pul, per)
			day2		0/127	3	0	0-0,25	10.4	8,6-12,2	2	50	21	0	0
Смирнов В.М.	СмВМ	KRAS G12C	day1		0/399	3	0	0-0,31	41.6	37,5-45,7	2	50	21	0	0												68	СRC		2023-04-21									на фоне ПХТ (3 цикл) FOLFIRI	прогрессирование от 29.03.23 очагив в печени	T4aN1aM0
			day2		2/208	3	0.21	0,03-0,67	22.1	19,1-25,1	2	50	21	36.75	36.75
Мезенина Е.М.	МеЕМ	KRAS G12V	day1		0/750	3	0	0-0,23	60.3	55,9-64,6	1.5	50	21	0	0												70	СRC		2023-04-21									на фоне ПХТ (иринотекан + бевацизумаб)	прогрессирование от 02.2023	T3N1aM1 (pulm, per)	yes 118385
			day2		0/2877	3	0	0-0,27	291	281-302	2	50	21	0	0
Белякова Г.А.	БеГА	HER2 amp, BRAF	day1		0/84	3	0	0-0,18	4.9	3,9-6,1	2	50	21	0	0												74	РЖ		2023-04-28			17.05.2023 (3 забор?)						на фоне ПХТ FOLFOX + трастузумаб)	частичный регресс от 20.04.23 (-54%)
Поликарпов Ал.Ви	ПоАВ	KRAS G12C	day1		0/78	3	0	0-0,2	5.1	4,1-6,4	1	50	21	0	0												50	РЛ		2023-05-17			2023-05-18						на фоне пембролизумаб + пеметрексед + карбоплатин (3 ц)	стабилизация от 06.04.2023)	T4N2M1 (oss)
			day2		0/81	3	0	0-0,21	5.7	4,5-7	1	50	21	0	0
Самойлов Г.К.	СаГК	BRAF V600E	day1		77/144	3	8.9	7-11	16.7	13,9-19,4	1	50	21	3115	3115		1.2	100	3	21	7.1	7.3	4141.67	0.14	0.33	81.6667	72	меланома		2023-05-17			2023-05-18						нет	прогрессирование от 01.2023	T3N0M0 (pulp, brain, adreno)
			day2		138/139	3	17.5	14,6-20,4	17.6	14,7-20,6	1	50	21	6125	6125		1.2	100	3	21	6.4	8	3733.33	0.98	0.67	571.667
Иванов Ал.Ал	ИвАА	EGFR del19ex	day1	p1	0/107	3	0	0-0,19	7	5,6-8,3	2	50	23.5	0	0												34	РЛ		2023-05-22			2023-05-22						на фоне ПХТ Пеметрексед+Карбоплатин + бевацизумаб	прогрессирование от 17.04.23	T4N1M1 (hep, pulm, oss)
Колышевская В.В.	КоВВ	BRAFV600E	day1		16/73	3	1.1	0,7-1,8	5.1	4-6,3	1.5	50	21	256.667	256.667												69	CRC		2023-05-23			2023-05-24						на фоне дабрафениб+траметиниб+панитумумаб	Прогрессирование от 26.04.23)	T4BN2M1 (hep)
			day2		9/92	3	1.2	0,6-2,1	12.1	9,7-14,7	1.5	50	21	280	280
			p3		115/390	3	15.5	12,7-18,4	54	48-59	1.5	50	21	3616.67	3616.67		1	100	3	21	6.4	14.9	4480	fail	fail	fail				2023-06-08
Аниконова Л.Т.	АнЛТ	BRAFV600E	day1		0/50	3	0	0-0,23	3.9	2,9-5	1.3	50	21	0	0												78	CRC		2023-05-23			2023-05-24						на фоне FOLFIRI+бевацизумаб	стабилизация от 28.04.23	T4bN1M1 (ov)
Попова Ан.Ив	ПоАИ	EGFR del19ex	day1	p1	0/180	3	0	0-0,13	8.1	6,9-9,3	2	50	23.5	0	0												81	РЛ		2023-06-08									не лечили (операция 2021; рекомендован осимертиниб)	прогрессирование
Козыревская Я.А.	КоЯА	EGFR L858R	day1	p1	0/51	3	0	0-0,21	3.5	2,6-4,6	2	50	23.5	0	0												47	РЛ		2023-06-08							2023-06-08		на фоне Осимертиниба (18 дней)		T2aN0M0
Воскресенская Л.С.	ВоЛС	EGFR del19ex	day1	p1	4/149	3	0.19	0,06-0,44	7	5,9-8,1	2	50	23.5	37.2083	37.2083												82	РЛ		2023-06-16									наивная , выписан осимертиниб	прогрессирование	T2N2M1 (pulm, hep, splen)
Фатеева Ж.М.	ФаЖМ	BRAF V600E	day1		0/262	3	0	0-0,12	10.2	9-11,4	2	50	21	0	0												76	CRC		2023-04-03			2023-04-04				2023-04-04		на фоне бевацизкмаба + XELOX (с 2021)	прогрессирование	T4aN3bM1b (lung, hep)		KROL
			day2		0/178	3	0	0-0,12	6.9	5,9-7,9	2	50	21	0	0
Малышев А.В.	МаАВ	BRAF V600E	day1		0/7	3	0	0-0,16	0.38	0,16-0,74	2	50	21	0	0												57	CRC		2023-04-03			2023-04-04				2023-04-04		на фоне бевацизкмаба + цетуксимаб (с 2021)	прогрессирование	T3N1aM0		KROL
			day2		0/4	3	0	0-0,14	0.19	0,06-0,45	2	50	21	0	0
Тюленев Ф.М.	ТюФМ	KRAS G12C	day1		0/1002	3	0	0-0,2	69.2	64,9-73,4	1.5	50	21	0	0												50	CRC		06.09.23?			07.09.23?				07.09.23?		на фоне Капецитабин+Бевацизумаб/ Иринотекан+Бевацизумаб	прогрессирование	T3N0M0 (брюшинаб,pulm)		KROL
			day2		0/668	3	0	0-0,12	26.3	24,3-28,3	2	50	21	0	0
Ларина Т.Л.	ЛаТЛ	BRAF V600E	day1 07.09.23		0/273	3	0	0-0,11	10.2	9-11,4	1.5	50	21	0	0		1.2	100	3	21	0	9.9	0	0	0.19	0											2023-09-21		на фоне ПХТ FOLFOX	стабилизация? Прогрессирование?	T4bN2M1 (pul, per, lymph)
			2023-09-21		7/1535	8	0.25	0,11-0,48	55.6	52,8-58,3	1.95	50	20	16.0256	16.0256		1.5	100	3	21	0	6.4	0	0	0.33	0
			2023-09-22		6/2498	8	0.17	0,07-0,35	73.8	71-76,7	1.9	50	20	11.1842	11.1842		1.5	100	3	21	0	12.4	0	0	0.24	0
			2023-10-26		0/17	6	0	0-0,13	0.75	0,44-1,16	1.69	50	20	0	0
			2023-11-17		0/121	3	0	0-0,11	4.7	3,8-5,5	1.7	50	20	0	0		1.5	100	3	21	0	6.2	0	0	0.21	0
			2024-01-19		3/603	3	0.1	0,02-0,28	21.2	19,5-22,9	1.6	50	20	20.8333			1.5	100	3	21	0	7.6	0	0	0.51	0
			2024-02-07											nd			1.5	100	3	21	0	19.5	0	0	0.62	0
Исмаилова Л.Ю.	ИсЛЮ	BRAF V600E	day1		0/964	8	0	0-0,1	33.9	31,8-36,1	1.4	50	20	0			1.3	100	3	21	0	7.2	0	0	0	0	63	CRC		2023-09-11			2023-09-12				2023-09-12		на фоне Дабрафениба+Траметиниба+Бевацизумаба от 29.08.23	прогрессирование	T4bN2aM0 (pulm,perit,hepat, большая ягодичная мышца справа)
			day2		0/590	8	0	0-0,11	21.6	19,9-23,3	1.9	50	20	0																2023-09-12
			2023-10-26		fail						1.84	50		nd
			2023-12-12		fail						1.84	50		nd			0.8	100	3	21	0	2.2	0	0	0	0
			2024-01-19		0/252	3	0	0-0,12	10.3	9,1-11,6	1.84	50	21	0			1.5	100	3	21	0	4.3	0	0	0.23	0
			2024-02-01		71/221	3	2.6	2,1-3,3	8.2	7,1-9,3	1.84	50	21	494.565	495
Барашкова Е.В.	БаЕВ	KRAS G12D	2023-09-20		248/802	6	9	7,8-10,1	29.2	27,2-21,2	1.4	50	20	1071.43	1071.43												53	CRC		2023-09-20			2023-09-21				2023-09-20		на фоне ПХТ FOLFOX	стабилизация??
			2023-09-21		81/718	6	3	2,4-3,7	26.5	24,6-28,5	1	50	20	500	500															2023-09-21
Мыльникова Т.А.	МыТА	KRAS G13D	2023-09-20		0/337	3	0	0-0,12	14	12,5-15,5	1.4	50		0													66	CRC		2023-09-20			2023-09-21				2023-09-20		на фоне ПХТ FOLFOX + бевацизумаб	стабилизация от 18.05.2023	T4bN1M0		MOIS
			2023-09-21		0/515	3	0	0-0,1	17.7	16,2-19,3	1.5	50		0																2023-09-21
Макарова Е.Н.	МаЕН	KRAS A146T	2023-09-25		2/236	8	0.1	0,01-0,31	11.6	10,1-13	1.6	50	20	7.8125	7.8125												59	CRC		2023-09-25			2023-09-26				2023-09-25		после операции 15.05.2023	прогрессирование mts в легких	T3N1M0	114286	MOIS
			2023-09-26		fail						1.7	50		nd																2023-09-26
Колесников Е.И.	КоЕИ	KRAS G12A	2023-09-25		fail						1.8	50		nd													76	CRC		2023-09-25			2023-09-26				2023-09-25		на фоне ПХТ FOLFOX	частичные регресс от 05.2023	T4bN1bM0		MOIS
	КоеН?		2023-09-26		fail						1.9	50		nd																2023-09-26
Василян Г.М.	ВаГМ	KRAS G12C	2023-09-25								2.1	50		nd													65	CRC		2023-09-25			2023-09-26				2023-09-25		на фоне ПХТ FOLFOX + бевацизумаб	прогрессирование mts в печени от 08.09.2023	T4aN0M1 (hep, lymph)		MOIS
			2023-09-26								1.6	50		nd																2023-09-26
Батов А.П.	БаАП	KRAS G13D	2023-09-25		fail						2	50		nd													33	CRC		2023-09-25			2023-09-26				2023-09-25		на фоне ПХТ FOLFOX + бевацизумаб	13.09 стабилизация	T3N1		MOIS
			2023-09-26		fail						1.9	50		nd																2023-09-26
Шахнович А.К.	ШаАК	KRAS G12S	2023-10-04		fail						1.95	50		nd													48	CRC		2023-10-04							2023-10-04
			2023-10-05		fail						1.95	50		nd																2023-10-05
Саженева О.В.	СаОВ	KRAS G12D	2023-10-04		fail						2.85	50		nd													70	CRC		2023-10-04							2023-10-04
			2023-10-05		fail						1.9	50		nd																2023-10-05
Перов В.Ю.	ПеВЮ	KRAS G13D	2023-10-12		166/232	3	5.3	4,5-6,2	7.5	6,5-8,4	1.75	50	21	1060	1060												60	CRC		2023-10-12							2023-10-12
			2023-10-13		94/135	3	3.8	3,1-4,6	5.4	4,5-6,4	1.8	50	21	738.889	738.889		1.5	100	3	21	73.8	110	34440	4.5	6.4	2100				2023-10-13
Стольникова Н.Ф.	СтНФ	KRAS G12V	2023-10-12								1.6	50		nd													64	CRC		2023-10-12							2023-10-13
			2023-10-13								1.35	50		nd																2023-10-13
Александрова Н.Н.	АлНН	KRAS G12R	2023-10-12		fail						1.65	50		nd													48	CRC		2023-10-12							2023-10-13
			2023-10-13		0/70	8	0	0-0,23	5.3	4,1-6,6	1.6	50	20	0	0															2023-10-13
Гущин А.И.	ГуАИ	KRAS G12V	2023-10-19								1.55	50		nd																2023-10-19							2023-10-20		На фоне 1 линии ПХТ FOLVOX+бевацизумаб	Стабилизация
			2023-10-20								1.85	50		nd																2023-10-20
Сухопарин А.В.	СуАВ	KRAS G12S	2023-10-23		fail						1.85	50		nd													67	CRC		2023-10-23							2023-10-23
			2023-10-24		fail						1.95	50		nd																2023-10-24
Иванова Н.И.	ИвНИ	BRAF V600E	2023-10-25		0/7	6	0	0-0,29	0.7	0,3-1,3	1.8	50	20	0													77	CRC		2023-10-25							2023-10-25			Продолженный рост вторичных очагов от 09.2023	cT4N1M1 (IV)
			2023-10-26		fail						2	50		nd																2023-10-26
Беляев Н.Г.	БеНГ	KRAS G12V	2023-10-26								1.86	50		nd													62	CRC		2023-10-26							2023-10-26				cT4bN1M1(IV)
			2023-10-27								1.9	50		nd																2023-10-27
Мартыненко С.В.	МаСВ	KRAS G12C	2023-10-26		0/9	6	0	0-0,29	0.9	0,4-1,6	2	50	20	0													72	CRC		2023-10-26							2023-10-26		Операция от 13.08.2021	Прогрессирование от 17.08.2023	pT4N1M1
			2023-10-27		0/4	6	0	0-0,37	0.5	0,2-1,2	1.8	50	20	0																2023-10-27
Зайцева М.М.	ЗаММ	BRAF V600E	2023-11-16		0/292	6	0	0-0,12	12.1	10,7-13,5				0													72	CRC		2023-11-16
Гончаренко О.А.	ГоОА	BRAF V600E	2023-11-17		0/368	6	0	0-0,12	14.4	13-15,9				0													50	РЛ
Яковлева А.С.	ЯкАС	BRAF V600	2023-12-25	P35593 смж										nd			1.3	100	3	21	0.29	4.5	156.154				39	Меланома		2023-12-25
			25.12.23 СМЖ	P35593 плазма										nd			1.5	100	3	21	0	2.4	0							25.12.23 СМЖ
Смирнов Л.В.	СмЛВ	BRAF V600E	2024-01-18		45/990	3	1.9	1,4-2,5	41.7	39,1-44,3	1.8	50	21	369.444	369.444		0.4	50	3	21	0.52	11.1	455				63	CRC									2024-01-18
			2024-01-19		43/634	3	1.9	1,4-2,5	27.6	25,5-29,8	1.8	50	21	369.444	369.444		0.4	50	3	21	0.66	13.3	577.5
Нетяга С.Г.	НеСГ	KRAS G12D	2024-01-24		53/183	3	4.3	3,2-5,6	14.9	12,8-17,1	1.8	50	21	836.111													58	РЛ		2024-01-24							24.01.24 (Пробирка для цоРНК)
			2024-01-25		35/97	3	2.8	2-3,8	7.8	6,3-9,4	1.8	50	21	544.444																2024-01-25

## Sheet: Long Dynamics rabtab
Patient	LAB_CODE	Mutation	Serial number	ddPCR (mut/wt)	Mut copies/ 1mL plasma	ddPCR EXO	Mut copies/ 1mL plasma EXO	ddPCR cfDNA	Mut copies/ 1mL plasma CfDNA	Diagnosis	DS_code	Data Plasma	Therapy	Disease Status	TNM	Block
Ершов А.Г.	ЕрАГ	EGFR ex19del	d2	0/268	0		106.667		0	РЛ	P36005	2024-01-18
Богданец М.М.БоММ	БоММ1	EGFR ex19del	baseline	35/259	26.9		400		0	РЛ	Baseline	2023-12-21
Богданец М.М.БоММ	БоММ7	EGFR ex19del	7день	0/1119	0		56		0	РЛ		2023-12-28
Новикова С.А.	НоСА	EGFR ex19del	Baseline (p1)	6/1113	98.4		224		0	РЛ	P39393-4	2024-07-15
Новикова С.А.	НоСА	EGFR ex19del	p2 (+12h)	2/357	33.76		93.3333		0	РЛ	P39393-3	2024-07-16
Крылова Ю.В.	КрЮВ	EGFR L858R	Baseline (p1)	2/2134	28	0/5057	0	6/3	49	РЛ	P42694	2025-02-18
Крылова Ю.В.	КрЮВ	EGFR L858R	p2 (+24h)	5/9222	74	0/6638	0	4/14	57	РЛ	P42695	2025-01-20
Крылова Ю.В.	КрЮВ	EGFR L858R	p3	2/1097	16	0/5103	0	0/4	0	РЛ	P42845	2025-02-26
Крылова Ю.В.	КрЮВ	T790M	Baseline (p1)	0/2131	0	4/5903	55	0/5	nd	РЛ	P42694	2025-02-18
Крылова Ю.В.	КрЮВ	T790M	p2 (+24h)	0/9201	0	2/6670	28	0/5	nd	РЛ	P42695	2025-01-20

## Sheet: KROLIK_raw
Patient	LAB_CODE	Localization	Diagnosis	Block	ID P#	Age	Mutation	Plasma 1	ctDNA extract	Exo extract	Plasma 2	ctDNA extract	Exo extract	Plasma 3	ctDNA extract	Exo extract	Plasma 4	blood (RNA)	Total RNA extract	Therapy	Disease Status	TNM	Notes
Карпеев Дм. Валер	КаДВ	CRC	Ad поперечно-ободочной	"-"	"-"	1968-02-26	KRAS G12D	2023-05-15			2023-05-16									2 цикла ХТ FOLFOX / 3 цикла Иринотекан+бевацизумаб (24.04.23)	прогрессирование от 03.2023	pT4bN2bM1 (hep)
Саулевич Ан.Ал	СаАА	CRC	Сигмовидная	"-"	"-"	1988-01-25	KRAS G12D	2023-05-15			2023-05-16									на фоне ХТ FOLFOX + бевацизумаб	регресс	T3N1M1a
Крюкова В.В.	КрВВ	CRC	Ободочная	"-"	"-"	1950-02-21	KRAS G12A	2023-05-15			2023-05-15									на фоне ХТ FOLFOX + бевацизумаб	стабилизация от 30.03.23	T3N2aM1b(hep, pulm)
Пономарева Н.И.	ПоНИ	PanC		22-5858			KRAS G12V	2023-05-14 08:00:00			14.05.23 полночь			2023-05-15 08:00:00							прогрессирование от 12.05.23
Маркова А.А.	МаАА	PAnC		101596		72 г	KRAS G12R	2023-05-15 08:00:00			15.05.23 полночь			2023-05-16 08:00:00						на фоне FOLFIRINOX	частичный регресс	T4N0M0
Высоцкий Л.М.	ВыЛМ	CRC	ободочная	"-"	"-"	1944-06-11	BRAF V600E	2023-05-18			2023-05-19									на фоне ПХТ XELOX jот 03.2023	прогресс?	T4N2bM1 (hep, pulm)
Райло Г.А.	РаГА	РЛ				1956-06-16	EML4ex13/ALKex20 (Zoo от 25.04.23)	2023-05-18			2023-05-19			2023-06-01						операция 12.01.04. Состояние на фоне алектиниба от 05.2023. PR от 07.2023	прогрессирование 2023	T2N1M0
Зубков В.А.	ЗуВА	CRC	Слепая кишка	"-"	"-"	1973-03-07	KRAS A146T	2023-05-29			2023-05-30									на фоне 2 линии FOLFIRI +бевацизумаб	стабилизация от 21.02.2023	T4aN2bM1c (hep, peri,
Харченко И.Н.	ХаИН	CRC	Толстая кишка	"-"	"-"	55 лет	KRAS G12A	2023-05-29			2023-05-30									на фоне XT иринотекан+бевацизумаб	прргрессирование mts в печени от 03.2023	T4aN1aMx
Амаева А.Х.	АмАХ	PanC		118194		56 лет	KRAS G12V	2023-05-29 08:00:00			29.05.23 полночь			2023-05-30 08:00:00						на фоне 4 цикла FOLFIRINOX	? стабилизация	T4N2
Зырянова Т.А.	ЗыТА	CRC	Ad поперечно-ободочной			59 лет	KRAS D13D	2023-06-09			2023-06-10									На фоне Капкцитабин + бевацизумаб	стабилизация от 04.2023	T4N1 M0
Володова Т.В.	ВоТВ	РЛ			P32074/P32075/P32330/P32740		EGFR ex19del, T790M?	11.06.23 (baseline)	0/0		13.06.2023 (48H)	0/0		23.06.2023 (30 days)	0/0		14.07.2023 (30 days)			На фоне афатиниба. 4 цикла ХТ (2019); 3 цикла иммунотерапии	прогрессирование 10.05	T4N2M0
Клещев А.А.	КлАА	PanC						2023-07-06 08:00:00			06.07.23 полночь			2023-07-07 08:00:00
Куреляк Ж.В.	КуЖВ	CRC	Сигмовидная			56 лет	KRAS G12D	2023-07-19			2023-07-20									На фоне бевацизкмаба (с 12.2022)	прогрессирование от 29.05.2023	T4bN2bM1b (per, oth)
Фатеева Ж.М.	ФаЖМ	CRC	Ободочная			76	BRAF V600E	2023-04-03			2023-04-04							2023-04-04		на фоне бевацизкмаба + XELOX (с 2021)	прогрессирование	T4aN3bM1b (lung, hep)
Малышев А.В.	МаАВ	CRC	Ободочная			57	BRAF V600E	2023-04-03			2023-04-04							2023-04-04		на фоне бевацизкмаба + цетуксимаб (с 2021)	прогрессирование	T3N1aM0
Щедрова Е.Ю.	ЩеЕЮ	PanC		стекла

## Sheet: Long Dynamics
Patient	LAB_CODE	Age	Diagnosis	DS_code	Mutation	Plasma 1	ctDNA extract	Exo extract	Plasma 2	ctDNA extract	Exo extract	Plasma 3	ctDNA extract	Exo extract	Plasma 4	blood (RNA)	Total RNA extract	Therapy	Disease Status	TNM	Block	Source
Жиделева В.М.	ЖиВМ	84	РЛ		EGFR ex20ins	2023-03-22			2023-03-22							22.03.2023 (откручены)		на фоне МХТ (пеметрексед); эрлотипиб (токсичность) до 12.2022;	прогрессирование от 28.12.2022	T3N1M0	yes 158787 (от 29.09.2022)	MOIS
Меринова Л.В.	МеЛВ	86	РЛ		EGFR L858R	2023-03-22												Наивная опухоль / осимертиниб с 21.03.23	прогрессирование от 30.11.2022	T2N1M1 (per)		MOIS
Пчелина Т.С.	ПчТС	61	РЛ	P30349/d2/P30621	EGFR del19ex	2023-03-14			2023-03-22	+		2023-03-28				2023-03-28		Наивная опухоль / осимертиниб с 21.03.23	прогрессирование	T2aN0M0	168373 (10.02.2023)	MOIS
Кортакова С.В.	КоСВ	51	РЛ		EGFR ex20ins	2023-03-21												Пеметрексед+Карбоплатин+Бевацизумаб	прогрессирование от 15.02.2023	T4N2M1 (oss,hep,pulp)	149536	MOIS
Первакова Т.А.	ПеТА	30	РЛ		EGFRdel19ex	раньше?			2023-03-29	+								на фоне афатиниба (с 14.01.2023)	nd	T2aN0M1 (ple,oss)		MOIS
Захаров А.В.	ЗаАВ	61	РЛ		ALK	2023-03-28			2023-04-11							2023-03-28		На фоне алектиниб	прогрессирование	T4N3M1c (pul, kid, oss, lymph,)		MOIS
Кокуин М.Н.	КоМН	71	РЛ		EGFR ex20ins	2023-03-29			2023-03-30							2023-03-29		На фоне 1 линии пеметрексед + карбоплатин	стабилизация	T3N1M1a (pulm, per)	PD-L negative, ALK negative	MOIS
Никонов В.В.	НиВВ	62	РЛ		EML4ex13/ALKex20 (V.1)	2023-03-31			2023-04-03							2023-03-30		на фоне 3 линии пеметрексид+карбоплатин+бевацизумаб (с 09.02.23)	прогрессирование с 01.2023	T2aN0M1 (pulm,hep, lymph)		MOIS
Володенко И.Н.	ВоИН	63	РЛ		EGFR L858R	2023-04-10			2023-04-17							2023-05-02		Наивная опухоль/перед началом Ирессы	прогрессирование	T2N3M1 (pulm, lymph, per)		MOIS
Тимофеева В.К.	ТиВК	73	РЛ		EGFR ex20ins	2023-04-28												на фоне пеметрексид + бевацизумаб	стабилизация от 07.03.2023	T2aN1M0		MOIS
Галстян Н.Г.	ГаНГ	nd	РЛ	?/P31619	EGFR del19ex	2023-05-03			2023-05-10			2023-05-22						Пеметрексед+Карбоплатин (отмена в связи с токсичностью 17.03.2023. Показан осимертиниб	прогрессирование	T2bN2M1 (oss)		MOIS
Гофтман Е.С.	ГоЕС	86	РЛ		EGFR L858R	2023-05-04			2023-05-12			2023-05-26						не лечили	прогрессирование	T2N0M0		MOIS
Иванов Ал.Ал	ИвАА	34	РЛ		EGFR del19ex	2023-05-22			2023-05-22									на фоне ПХТ Пеметрексед+Карбоплатин + бевацизумаб	прогрессирование от 17.04.23	T4N1M1 (hep, pulm, oss)		MOIS
Сивченко Л.Д.	СиЛД	80	РЛ		EGFR+							2023-05-26						наивная (назначен осимертиниб)	после операции от 17.03.2023	T2aNa		MOIS
Попова Ан.Ив	ПоАИ	81	РЛ		EGFR del19ex	2023-06-08												не лечили (операция 2021; рекомендован осимертиниб)	прогрессирование			MOIS
Козыревская Я.А.	КоЯА	47	РЛ		EGFR L858R	2023-06-08										2023-06-08		на фоне Осимертиниба (18 дней)		T2aN0M0		MOIS
Воскресенская Л.С.	ВоЛС	82	РЛ		EGFR del19ex	2023-06-16												наивная , выписан осимертиниб	прогрессирование	T2N2M1 (pulm, hep, splen)		MOIS
Саифиуллин Б.А.	СаБА	56	РЛ		RET KIF5Bex15-RETex12	2023-06-15			2023-06-16							2023-06-16						MOIS
Райло Г.А.	РаГА	67	РЛ		EML4ex13/ALKex20 (Zoo от 25.04.23)	2023-05-18			2023-05-19			2023-06-01						операция 12.01.04. Состояние на фоне алектиниба от 05.2023. PR от 07.2023	прогрессирование 2023	T2N1M0		KROL
Володова Т.В.	ВоТВ		РЛ	P32074/P32075/P32330/P32740	EGFR ex19del, T790M?	11.06.23 (baseline)	0/0		13.06.2023 (48H)	0/0		23.06.2023 (14 days)			14.07.2023 (30 days)	no		На фоне афатиниба. 4 цикла ХТ (2019); 3 цикла иммунотерапии	прогрессирование 10.05	T4N2M0		KROL

## Sheet: TRIPLE _PANc
Patient	LabCode	Diagnosis	Block	ID P#	Age	Mutation	Plasma 1	Plasma 2	Plasma 3	Therapy	Disease Status	TNM	Notes
Пономарева Н.И.	ПоНИ	PanC	22-5858			KRAS G12V	2023-05-14 08:00:00	14.05.23 полночь	2023-05-15 08:00:00		прогрессирование от 12.05.23	.
Маркова А.А.	МаАА	PAnC	101596		72	KRAS G12R	2023-05-15 08:00:00	15.05.23 полночь	2023-05-16 08:00:00	на фоне FOLFIRINOX	частичный регресс	T4N0M0
Амаева А.Х.	АмАХ	PanC	118194		56	KRAS G12V	2023-05-29 08:00:00	29.05.23 полночь	2023-05-30 08:00:00	на фоне 4 цикла FOLFIRINOX	? стабилизация	T4N2
Клещев А.А.	КлАА	PanC					2023-07-06 08:00:00	06.07.23 полночь	2023-07-07 08:00:00

## Sheet: Воспроизводимость (дуплеты+INF)
Patient	LAB_CODE	Age	Localization	Diagnosis	Mutation	Plasma 1	ctDNA extract	Exo extract	Plasma 2	ctDNA extract	Exo extract	Plasma 3	blood (RNA)	Total RNA extract	Therapy	Disease Status	TNM	Block	Source
Карпеев Дм. Валер	КаДВ	55	CRC	Ad поперечно-ободочной	KRAS G12D	2023-05-15			2023-05-16						2 цикла ХТ FOLFOX / 3 цикла Иринотекан+бевацизумаб (24.04.23)	прогрессирование от 03.2023	pT4bN2bM1 (hep)		KROL
Саулевич Ан.Ал	СаАА	35	CRC	Сигмовидная	KRAS G12D	2023-05-15			2023-05-16						на фоне ХТ FOLFOX + бевацизумаб	регресс	T3N1M1a		KROL
Крюкова В.В.	КрВВ	73	CRC	Ободочная	KRAS G12A	2023-05-15			2023-05-15						на фоне ХТ FOLFOX + бевацизумаб	стабилизация от 30.03.23	T3N2aM1b(hep, pulm)		KROL
Высоцкий Л.М.	ВыЛМ	79	CRC	ободочная	BRAF V600E	2023-05-18			2023-05-19						на фоне ПХТ XELOX jот 03.2023	прогресс?	T4N2bM1 (hep, pulm)		KROL
Зубков В.А.	ЗуВА	50	CRC	Слепая кишка	KRAS A146T	2023-05-29			2023-05-30						на фоне 2 линии FOLFIRI +бевацизумаб	стабилизация от 21.02.2023	T4aN2bM1c (hep, peri,		KROL
Харченко И.Н.	ХаИН	55	CRC	Толстая кишка	KRAS G12A	2023-05-29			2023-05-30						на фоне XT иринотекан+бевацизумаб	прргрессирование mts в печени от 03.2023	T4aN1aMx		KROL
Зырянова Т.А.	ЗыТА	59	CRC	Ad поперечно-ободочной	KRAS D13D	2023-06-09			2023-06-10						На фоне Капкцитабин + бевацизумаб	стабилизация от 04.2023	T4N1 M0		KROL
Куреляк Ж.В.	КуЖВ	56	CRC	Сигмовидная	KRAS G12D	2023-07-19			2023-07-20						На фоне бевацизкмаба (с 12.2022)	прогрессирование от 29.05.2023	T4bN2bM1b (per, oth)		KROL
Веселов МА	ВеМА	63	РЛ		BRAF V600E	2023-03-14	+		2023-03-15	+			2023-03-14		на фоне ТС+ бевацизумаб (с 21.02.23)	прогрессирование от 02.2023	T4N3M1 (oss, hep, pul)	yes 169461 (от 27.09.2022
Вагин СЕ	ВаСЕ	67	РЛ		KRAS G12C	2023-03-15	+		2023-03-16	+			2023-03-15		на фоне ПХТ (карбоплатин/пеметрексед + бевацизумаб (с 21.02.23)	прогрессирование от 11.2022	T3N2M1 (IV st. oss, pulm)	yes 159843-2
Жиделева В.М.	ЖиВМ	84	РЛ		EGFR ex20ins	2023-03-22			2023-03-22				22.03.2023 (откручены)		на фоне МХТ (пеметрексед); эрлотипиб (токсичность) до 12.2022;	прогрессирование от 28.12.2022	T3N1M0	yes 158787 (от 29.09.2022)
Терентьев С.В.	ТеСВ	55	CRC		BRAF V600E	2023-03-22			2023-03-23				22.03.2023 (откручены)		на фоне ПХТ (FOLFOX-бевацизумаб)	регресс опухоли, mts в печени и рег лимфоузлах	T4N1M1(hep)	yes 162119 (07.11.2022)
Меринова Л.В.	МеЛВ	86	РЛ		EGFR L858R	2023-03-22									Наивная опухоль / осимертиниб с 21.03.23	прогрессирование от 30.11.2022	T2N1M1 (per)
Кортакова С.В.	КоСВ	51	РЛ		EGFR ex20ins	2023-03-21									Пеметрексед+Карбоплатин+Бевацизумаб	прогрессирование от 15.02.2023	T4N2M1 (oss,hep,pulp)	149536
Белякова Т.А.	БеТА	71	CRC		BRAF V600E	2023-03-24			2023-03-27				2023-03-24		на фоне 1 линии ПХТ FOLFOX + бевацизумаб (начата за 10 дней до сдачи плазмы)	nd	T3NxM1 (per)	yes 158411 (от10.12.2022)
Ракитянская Г.Г.	РаГГ	73	CRC		KRAS	2023-03-24			2023-03-27				2023-03-24		на фоне 1 линии ПХТ FOLFOX + бевацизумаб (начата за 10 дней до сдачи плазмы)	nd	T4bN2suspM1 (lym)	yes 162120
Мохнатых А.В.	МоАВ	56	CRC		BRAF V600E	2023-03-27			2023-03-28				2023-03-27		на фоне 1 линии ПХТ FOLFOX + бевацизумаб (начата за 37 дней до сдачи плазмы)	прогрессирование, асцит	T4aN1M1(hep, per)	yes 168144
Пальм В.Н.	ПаВН	0	РЖ		HER2	2023-03-28			2023-03-29				2023-03-28		Наивная опухоль	прогрессирование, асцит	TxN2M1 (oss, prostata, lymph)	yes 171135
Романович И.Н.	РоИН	66	CRC		BRAFV600E	2023-03-28			2023-03-29				2023-03-28		Операция 06.02 + XELOX 07.03.2023	nd	T3N1bM0	yes 168859
Бугой С.Г.	БуСГ	62	РЖ		HER2	2023-03-28							2023-03-28		на фоне 1 линии FOLFOX+трастузумаб (23.12.2022)	регресс	T4N1M1 (hep, perit)
Молодожникова Л.В.	МоЛА	74	CRC		BRAFV600E, MSI-H	2023-03-28			2023-03-29				2023-03-28		XELOX N3 (09.2021)	прогрессирование	T4bN1Mx
Бахвалова Е.Н.	БаЕН	40	CRC		KRAS 12/13	2023-03-28			2023-03-29				2023-03-28		На фоне 1 линии ПХТ по схеме FOLFOX+бевацизумаб с 10.03.2023	стабилизация (по КТ)	T4aN2bM0	yes 169440
Рывлина О.Н.	РыОН	75	РЖ		MSI-H	2023-03-28									На фоне 1 линии пембролизумаб	прогрессирование	T4N1M0	yes 140929
Кокуин М.Н.	КоМН	71	РЛ		EGFR ex20ins	2023-03-29			2023-03-30				2023-03-29		На фоне 1 линии пеметрексед + карбоплатин	стабилизация	T3N1M1a (pulm, per)	PD-L negative, ALK negative
Ващилова Т.М.	ВаТМ	79	РЖ, РМЖ (1993)		MSI-H	2023-03-29			2023-03-30				2023-03-29		на фоне 1 линии FOLFOX+трастузумаб (03.02.2022)	стабилизация, до того частичный регресс от 17.11.22)	T3N1M1(lymph,hep)
Иксанова И.В.	ИкИВ	63	CRC		KRAS G12A	2023-03-30			2023-03-31	+			2023-03-30		на фоне 1 линии ПХТ FOLFIRI + бевацизумаб	частичный регресс от 08.22, сейчас возможно прогрессирование??	T3N1M1 (hep, pulm)
Карсканова Т.Н.	КаТН	57	CRC		NRAS G13R	2023-03-30	+		2023-03-31	+			2023-03-30		на фоне 1 линии ПХТ FOLFIRI + бевацизумаб	прогрессирование от 11.2022	T4aN2a
Новикова Г.В.	НоГВ	72	CRC		KRAS	2023-03-30	+		2023-03-31	+			2023-03-30		На фоне ПХТ FOLFOX+бевацезумаб	стабилизация	T4NxM1 (per, susp hep)	yes 164594
Славец Е.А.	СлЕА	50	CRC		KRAS	2023-03-30	+		2023-03-31	+			2023-03-30		Наивная опухоль	прогрессирование	T4N1M1 (hep, lym)	yes 168873
Беляков Ю.А.	БеЮА	58	CRC		KRAS 12/13	2023-04-03			2023-04-04				2023-04-04		на фоне FOLFOX + бевацизумаб (с 12.2022)	увеличение очагов в печени в рамках SD	T3N1M1 (hep)	yes 162551
Бруенок А.Б.	БрАБ	50	CRC		KRAS 12/13	2023-04-03			2023-04-04				2023-04-04		на фоне 1 цикла Иринотекан, фторурацил, Бевацизумаб	прогрессирование от 01.2023	T4bN2aM0	yes 147747
Тихомиров В.В.	ТиВВ	49	CRC		KRAS 12/13	2023-04-10			2023-04-11				2023-04-10		на фоне FOLFOX + бевацизумаб (с 12.2022)	прогрессирование от 22.12.2022	T2N2M1	ПЛ25 yes 192061
Михайлов А.В.	МиАВ	46	CRC		KRAS G12D	2023-04-10			2023-04-11				2023-04-10		на фоне FOLFOX + бевацизумаб (с 25.01.2023)	стаблизация от 03.03.2023	T3cN2bM1 (hep, pul, per)
Сурменок А.М.	СуАМ	65	CRC		KRAS 12/13	2023-04-12			2023-04-13				2023-04-12		после ЛУ (20.10.22 - 24.11.22)	прогрессирование очагов в легких от 02.23	T2/3N0M1 (pulm)	yes 159585
Смирнов В.М.	СмВМ	68	СRC		KRAS G12C	2023-04-21									на фоне ПХТ (3 цикл) FOLFIRI	прогрессирование от 29.03.23 очагив в печени	T4aN1aM0
Мезенина Е.М.	МеЕМ	70	СRC		KRAS G12V	2023-04-21									на фоне ПХТ (иринотекан + бевацизумаб)	прогрессирование от 02.2023	T3N1aM1 (pulm, per)	yes 118385
Демидов С.В.	ДеСВ	60	CRC		KRAS 12/13										перед началом ПХТ	после операции (14.03.23)	T3N1aM0
Гродинский М.Я.	ГрМЯ	67	РЛ		BRAF K601E										на фоне ПХТ (пеметрексед+карбоплатин+ бевацизумаб)	нарастание очагов в костях от 29.12.22	T2N2M1 (oss, pulm)
Тимофеева В.К.	ТиВК	73	РЛ		EGFR ex20ins	2023-04-28									на фоне пеметрексид + бевацизумаб	стабилизация от 07.03.2023	T2aN1M0
Белякова Г.А.	БеГА	74	РЖ		HER2 amp, BRAF	2023-04-28			17.05.2023 (3 забор?)						на фоне ПХТ FOLFOX + трастузумаб)	частичный регресс от 20.04.23 (-54%)
Поликарпов Ал.Ви	ПоАВ	50	РЛ		KRAS G12C	2023-05-17			2023-05-18						на фоне пембролизумаб + пеметрексед + карбоплатин (3 ц)	стабилизация от 06.04.2023)	T4N2M1 (oss)
Самойлов Г.К.	СаГК	72	меланома		BRAF V600E	2023-05-17			2023-05-18						нет	прогрессирование от 01.2023	T3N0M0 (pulp, brain, adreno)
Гарбузов С.Л.	ГаСЛ	63	СRC		KRAS 12/13	2023-05-17			2023-05-18						на фоне ПХТ (ФУ+Платина)+ бевацизумаб	после операции (23.03.23)	T4aN1M1 (hep)
Иванов Ал.Ал	ИвАА	34	РЛ		EGFR del19ex	2023-05-22			2023-05-22						на фоне ПХТ Пеметрексед+Карбоплатин + бевацизумаб	прогрессирование от 17.04.23	T4N1M1 (hep, pulm, oss)
Колышевская В.В.	КоВВ	69	CRC		BRAFV600E	2023-05-23			2023-05-24						на фоне дабрафениб+траметиниб+панитумумаб	Прогрессирование от 26.04.23)	T4BN2M1 (hep)
Аниконова Л.Т.	АнЛТ	78	CRC		BRAFV600E	2023-05-23			2023-05-24						на фоне FOLFIRI+бевацизумаб	стабилизация от 28.04.23	T4bN1M1 (ov)
Сивченко Л.Д.	СиЛД	80	РЛ		EGFR+							2023-05-26			наивная (назначен осимертиниб)	после операции от 17.03.2023	T2aNa
Григорьева Л.В.	ГрЛВ	74	РЛ		KRAS 12/13/ EGFR??	2023-05-31									после операции	после операции 14.04.23
Румянцев В.А.	РуВА	73	СRC		KRAS 12/13	2023-05-31									на фоне FOLFOX+бевацизумаб	прогрессирование 05.2023	T2N0Mх (hep)
Попова Ан.Ив	ПоАИ	81	РЛ		EGFR del19ex	2023-06-08									не лечили (операция 2021; рекомендован осимертиниб)	прогрессирование
Колишевская В.В	КоВВ	69	CRC		BRAFV600E	2023-06-08									на фоне Траметиниб + панитумумаб	стабилизация от 04.11.22	T4bN2aM1 (hep)
Козыревская Я.А.	КоЯА	47	РЛ		EGFR L858R	2023-06-08							2023-06-08		на фоне Осимертиниба (18 дней)		T2aN0M0
Воскресенская Л.С.	ВоЛС	82	РЛ		EGFR del19ex	2023-06-16									наивная , выписан осимертиниб	прогрессирование	T2N2M1 (pulm, hep, splen)
Саифиуллин Б.А.	СаБА	56	РЛ		RET KIF5Bex15-RETex12	2023-06-15			2023-06-16				2023-06-16
Фатеева Ж.М.	ФаЖМ	76	CRC		BRAF V600E	2023-04-03			2023-04-04				2023-04-04		на фоне бевацизкмаба + XELOX (с 2021)	прогрессирование	T4aN3bM1b (lung, hep)		KROL
Малышев А.В.	МаАВ	57	CRC		BRAF V600E	2023-04-03			2023-04-04				2023-04-04		на фоне бевацизкмаба + цетуксимаб (с 2021)	прогрессирование	T3N1aM0		KROL

## Sheet: Index_INF
Patient	LAB_CODE	Age	Data (blood)	Diagnosis	Mutation	Plasma 1	ctDNA extract	Exo extract	Plasma 2	ctDNA extract	Exo extract	Plasma 3	blood (RNA)	Total RNA extract	Therapy	Disease Status	TNM	Block	Source
Веселов МА	ВеМА	1960-09-23	2023-03-14	РЛ	BRAF V600E	2023-03-14	+		2023-03-15	+			2023-03-14		на фоне ТС+ бевацизумаб (с 21.02.23)	прогрессирование от 02.2023	T4N3M1 (oss, hep, pul)	yes 169461 (от 27.09.2022	MOIS
Вагин СЕ	ВаСЕ	1956-06-03	2023-03-15	РЛ	KRAS G12C	2023-03-15	+		2023-03-16	+			2023-03-15		на фоне ПХТ (карбоплатин/пеметрексед + бевацизумаб (с 21.02.23)	прогрессирование от 11.2022	T3N2M1 (IV st. oss, pulm)	yes 159843-2	MOIS
Жиделева В.М.	ЖиВМ	1939-03-21	2023-03-22	РЛ	EGFR ex20ins	2023-03-22			2023-03-22				22.03.2023 (откручены)		на фоне МХТ (пеметрексед); эрлотипиб (токсичность) до 12.2022;	прогрессирование от 28.12.2022	T3N1M0	yes 158787 (от 29.09.2022)	MOIS
Терентьев С.В.	ТеСВ	1968-06-25	2023-03-22	CRC	BRAF V600E	2023-03-22			2023-03-23				22.03.2023 (откручены)		на фоне ПХТ (FOLFOX-бевацизумаб)	регресс опухоли, mts в печени и рег лимфоузлах	T4N1M1(hep)	yes 162119 (07.11.2022)	MOIS
Пчелина Т.С.	ПчТС	1962-10-03	2023-03-22	РЛ	EGFR del19ex	раньше?			2023-03-22	+		2023-03-28	2023-03-28		Наивная опухоль / осимертиниб с 21.03.23	прогрессирование	T2aN0M0	168373 (10.02.2023)	MOIS
Белякова Т.А.	БеТА	1952-09-05	2023-03-24	CRC	BRAF V600E	2023-03-24			2023-03-27				2023-03-24		на фоне 1 линии ПХТ FOLFOX + бевацизумаб (начата за 10 дней до сдачи плазмы)	nd	T3NxM1 (per)	yes 158411 (от10.12.2022)	MOIS
Ракитянская Г.Г.	РаГГ	1950-01-19	2023-03-24	CRC	KRAS	2023-03-24			2023-03-27				2023-03-24		на фоне 1 линии ПХТ FOLFOX + бевацизумаб (начата за 10 дней до сдачи плазмы)	nd	T4bN2suspM1 (lym)	yes 162120	MOIS
Мохнатых А.В.	МоАВ	1967-07-07	2023-03-27	CRC	BRAF V600E	2023-03-27			2023-03-28				2023-03-27		на фоне 1 линии ПХТ FOLFOX + бевацизумаб (начата за 37 дней до сдачи плазмы)	прогрессирование, асцит	T4aN1M1(hep, per)	yes 168144	MOIS
Пальм В.Н.	ПаВН	2023-03-19	2023-03-28	РЖ	HER2	2023-03-28			2023-03-29				2023-03-28		Наивная опухоль	прогрессирование, асцит	TxN2M1 (oss, prostata, lymph)	yes 171135	MOIS
Романович И.Н.	РоИН	1957-03-20	2023-03-28	CRC	BRAFV600E	2023-03-28			2023-03-29				2023-03-28		Операция 06.02 + XELOX 07.03.2023	nd	T3N1bM0	yes 168859	MOIS
Бугой С.Г.	БуСГ	1961-07-25	2023-03-28	РЖ	HER2	2023-03-28							2023-03-28		на фоне 1 линии FOLFOX+трастузумаб (23.12.2022)	регресс	T4N1M1 (hep, perit)		MOIS
Молодожникова Л.В.	МоЛА	1949-12-17	2023-03-28	CRC	BRAFV600E, MSI-H	2023-03-28			2023-03-29				2023-03-28		XELOX N3 (09.2021)	прогрессирование	T4bN1Mx		MOIS
Бахвалова Е.Н.	БаЕН	1983-05-26	2023-03-28	CRC	KRAS 12/13	2023-03-28			2023-03-29				2023-03-28		На фоне 1 линии ПХТ по схеме FOLFOX+бевацизумаб с 10.03.2023	стабилизация (по КТ)	T4aN2bM0	yes 169440	MOIS
Захаров А.В.	ЗаАВ	1962-11-15	2023-03-28	РЛ	ALK	2023-03-28			2023-04-11				2023-03-28		На фоне алектиниб	прогрессирование	T4N3M1c (pul, kid, oss, lymph,)		MOIS
Кокуин М.Н.	КоМН	1952-01-23	2023-03-29	РЛ	EGFR ex20ins	2023-03-29			2023-03-30				2023-03-29		На фоне 1 линии пеметрексед + карбоплатин	стабилизация	T3N1M1a (pulm, per)	PD-L negative, ALK negative	MOIS
Ващилова Т.М.	ВаТМ	1944-08-29	2023-03-29	РЖ, РМЖ (1993)	MSI-H	2023-03-29			2023-03-30				2023-03-29		на фоне 1 линии FOLFOX+трастузумаб (03.02.2022)	стабилизация, до того частичный регресс от 17.11.22)	T3N1M1(lymph,hep)		MOIS
Иксанова И.В.	ИкИВ	1960-12-20	2023-03-30	CRC	KRAS G12A	2023-03-30			2023-03-31	+			2023-03-30		на фоне 1 линии ПХТ FOLFIRI + бевацизумаб	частичный регресс от 08.22, сейчас возможно прогрессирование??	T3N1M1 (hep, pulm)		MOIS
Карсканова Т.Н.	КаТН	1966-06-14	2023-03-30	CRC	NRAS G13R	2023-03-30	+		2023-03-31	+			2023-03-30		на фоне 1 линии ПХТ FOLFIRI + бевацизумаб	прогрессирование от 11.2022	T4aN2a		MOIS
Новикова Г.В.	НоГВ	1951-07-30	2023-03-30	CRC	KRAS	2023-03-30	+		2023-03-31	+			2023-03-30		На фоне ПХТ FOLFOX+бевацезумаб	стабилизация	T4NxM1 (per, susp hep)	yes 164594	MOIS
Славец Е.А.	СлЕА	1973-03-18	2023-03-30	CRC	KRAS	2023-03-30	+		2023-03-31	+			2023-03-30		Наивная опухоль	прогрессирование	T4N1M1 (hep, lym)	yes 168873	MOIS
Никонов В.В.	НиВВ	1961-11-01	2023-03-30	РЛ	EML4ex13/ALKex20 (V.1)	2023-03-31			2023-04-03				2023-03-30		на фоне 3 линии пеметрексид+карбоплатин+бевацизумаб (с 09.02.23)	прогрессирование с 01.2023	T2aN0M1 (pulm,hep, lymph)		MOIS
Беляков Ю.А.	БеЮА	1965-04-22	2023-04-03	CRC	KRAS 12/13	2023-04-03			2023-04-04				2023-04-04		на фоне FOLFOX + бевацизумаб (с 12.2022)	увеличение очагов в печени в рамках SD	T3N1M1 (hep)	yes 162551	MOIS
Бруенок А.Б.	БрАБ	1973-07-26	2023-04-03	CRC	KRAS 12/13	2023-04-03			2023-04-04				2023-04-04		на фоне 1 цикла Иринотекан, фторурацил, Бевацизумаб	прогрессирование от 01.2023	T4bN2aM0	yes 147747	MOIS
Володенко И.Н.	ВоИН	1960-11-08	2023-04-11	РЛ	EGFR L858R	2023-04-10			2023-04-17				2023-05-02		Наивная опухоль/перед началом Ирессы	прогрессирование	T2N3M1 (pulm, lymph, per)		MOIS
Тихомиров В.В.	ТиВВ	1974-12-25	ВИЧ	CRC	KRAS 12/13	2023-04-10			2023-04-11				2023-04-10		на фоне FOLFOX + бевацизумаб (с 12.2022)	прогрессирование от 22.12.2022	T2N2M1	ПЛ25 yes 192061	MOIS
Михайлов А.В.	МиАВ	1977-01-04	2023-04-10	CRC	KRAS G12D	2023-04-10			2023-04-11				2023-04-10		на фоне FOLFOX + бевацизумаб (с 25.01.2023)	стаблизация от 03.03.2023	T3cN2bM1 (hep, pul, per)		MOIS
Сурменок А.М.	СуАМ	1958-02-14	2023-04-12	CRC	KRAS 12/13	2023-04-12			2023-04-13				2023-04-12		после ЛУ (20.10.22 - 24.11.22)	прогрессирование очагов в легких от 02.23	T2/3N0M1 (pulm)	yes 159585	MOIS
Козыревская Я.А.	КоЯА	1976-09-27		РЛ	EGFR L858R	2023-06-08							2023-06-08		на фоне Осимертиниба (18 дней)		T2aN0M0		MOIS
Саифиуллин Б.А.	СаБА	1967-01-22		РЛ	RET KIF5Bex15-RETex12	2023-06-15			2023-06-16				2023-06-16						MOIS
Фатеева Ж.М.	ФаЖМ	76	CRC		BRAF V600E	2023-04-03			2023-04-04				2023-04-04		на фоне бевацизкмаба + XELOX (с 2021)	прогрессирование	T4aN3bM1b (lung, hep)		KROL
Малышев А.В.	МаАВ	57	CRC		BRAF V600E	2023-04-03			2023-04-04				2023-04-04		на фоне бевацизкмаба + цетуксимаб (с 2021)	прогрессирование	T3N1aM0		KROL

## Sheet: ALK
Patient	LAB_CODE	Mutation	Serial number	Lab ID	ddPCR (mut/wt)	V aliquota cfDNA for ddPCR	Concentration mut/1mkL	Interval (Poisson CI)	Concentration wt/1mkL	Interval (Poisson CI)	V plasma mL	V dilution mkL	V reaction ddPCR mkL (18 + V template)	Mut copies/ 1mL plasma* (Give higher priority to the concentrated probes)	Wt copies/ 1mL plasma	AF, %	Age	Localization	Diagnosis	Plasma 1	ctDNA extract	Exo extract	Plasma 2	ctDNA extract	Exo extract	Plasma 3	blood (RNA)	Total RNA extract	Therapy	Disease Status	TNM	Block	Source
Саифиуллин Б.А.	СаБА	RET KIF5Bex15-RETex12	day1	+ 14.05.23							1.5	50					56	РЛ		2023-06-15			2023-06-16				2023-06-16
			day2	+ 15.05.23							1.5	50
Татаринова Н.Н.	ТаНН	ALK+	2023-10-04								1.9	50					40	РЛ		2023-10-04							2023-10-04
			2023-10-05								1.6	50								2023-10-05
Дрюкова А.В.	ДрАВ	ROS1	2023-10-12								1.6	50					70	РЛ		2023-10-12							2023-10-13
			2023-10-13								1.1	50								2023-10-13
Новосельцев И.Н.	НоИН	ALK+	2023-10-12								1.4	50					61	РЛ		2023-10-12							2023-10-13
			2023-10-13								1.4	50								2023-10-13
Гречишкин С.А.	ГрСА	ALK+	2023-10-12	Fu20477							1.9	50					59	РЛ		2023-10-12							2023-10-13
			2023-10-13								1.9	50								2023-10-13
Марганян Л.В.	МаЛВ	ALK v1	2023-10-26								2	50					43	РЛ		2023-10-26							2023-10-27		Операция от 24.03.2020	Прогрессирование от 31.03.2023	cT2aN2M1 IV
			2023-10-27								2	50								2023-10-27
Данькин А.И.	ДаАИ	ALK	2023-10-26								1.5	50					51	РЛ		2023-10-26							2023-10-27			Прогрессирование от 18.10.2023, 25.04.2023	cT3N1M1a IV
			2023-10-27								2	50								2023-10-27
Рыбаков Том Люсьенович	РыТЛ	ALK EML4ex6/ALKex20 (V.3a.b)	2023-11-05								1.9	50					74	РЛ		2023-11-05							2023-10-05		Терапия Алектинибом		cT4N2M1b
			2023-11-06								1.95	50								2023-11-06
Редькина Борис Николаевич	Ре БН	ALK EML4ex13/ALKex20	2023-11-05								1.65	50					76	РЛ		2023-11-05							2023-10-05		Стенирование ОА 07.10.2021, ПМЖВ 23.08.2021		pT2N2M1
			2023-11-06								1.8	50								2023-11-06
Ляховицкая Любовь Афраимовна	ЛяЛА	ALK EML4ex6/ALKex20 V3	2023-11-09														85	РЛ		2023-11-09							2023-11-10
			2023-11-10																	2023-11-10
Соколова Татьяна Анатольевна	СоТА	ALK EML4 ex13/ALKex20 V.1	2023-11-09														65	РЛ		2023-11-09							2023-11-10
			2023-11-10																	2023-11-10
Мираев Ш.Н.	МиШН	ALK ?	2023-11-09															РЛ		2023-11-09							2023-11-10
			2023-11-10																	2023-11-10
Брыкин Владимир Анатольевич	БрВА	ALK EML4ex6/ALKex20 (V.3)	2023-11-18														50	РЛ		2023-11-18							2023-11-19
			2023-11-19																	2023-11-19
Мартиросян И.С.	МаИС	ALK+	2024-04-28																									РЛ
			2024-04-29
Гайдай Ник Павл	ГаНП	ALK EML4ex6/ALKex20	2024-05-15																									РЛ
			2024-05-16
Машинов Ник Ив	МаНИ	ALK EML4-ALK (E4, A20)	2024-05-15																									РЛ
			2024-05-16
Зайцева Нел.Назир	ЗаНН	ALK (?)	2024-05-30																								55	РЛ
Аристова Ек.Ю	АрЕЮ	ALK EML4ex18/ALKex20, V.9)	06.06,2024																								47	РЛ
			2024-06-07								1.5	70					1.5
Милашкина Т.В.	МиТВ	ALK EML4, V.1	06.06,2024																								69	РЛ
			2024-06-07
Южанова С.А.	ЮжСА	EML4ex6/ALKex20 (v.3)	2024-06-27																									РЛ
			2024-06-28
Ухова О.А.	УхОА	EML4ex13/ALKex20 (v.1)	2024-06-27																									РЛ
			2024-06-28
Бабошин В.П.	БаВП	ALK какая есть блок	2024-06-27																									РЛ
			2024-06-28
Калинин А.А.	КаАА	EML4ex13/ALKex20(v.1)	2024-06-27								2	50					2											РЛ
			2024-06-28								2	50					2
Дадыко Вера Алексеевна	Да ВА	EML4ex6/ALKex20 (v.3)	2024-07-04								1.5	50					1.5											РЛ
			2024-07-05								1.5	50					1.5
Соколова Т.А.	СоТА	EML4ex13/ALKex20(v.1)	2024-08-01								1.5																	РЛ
			2024-08-02								1.5
Чесновока Е.А.	ЧеЕА	EML4ex20/ALKex20(v.2)	2024-08-09								1.3	50					1.3											РЛ
			2024-08-10								1.3	50					1.3
Брыкин Владимир Анатольевич	БрВА	ALK EML4ex6/ALKex20 (V.3)	2023-11-18																								50	РЛ		2023-11-18							2023-11-19
			2023-11-19																											2023-11-19
Дытынис А.И	ДыАИ	ALK v.1	baseline								1.5	70					39	РЛ	2023-12-20		1.5							CRC	MSI, Синдром Линча (MSH6 c.2690delA), POLE c.1420G>A (p.Val474Ile)
			d1																2023-12-21
Барахоева Т.М.	БаТМ	CCDC6-RET (C1;R12)	2025-04-03
		KRAS G13D

[truncated: 6 more sheets: X-ray, Лист3, PEG_exo_ctDNA redo, Supplementary Table 1S, Supplementary Table 2S, Supplementary Table_3S]
